## **Activated PI3K $\delta$ syndrome, an immunodeficiency disorder, leads to sensorimotor deficits recapitulated in a murine model.**

Ines Serra<sup>1\*</sup>, Olivia R. Manusama<sup>2\*</sup>, Fabian M. P. Kaiser<sup>2,3</sup>, Izi Izumi Floriano<sup>1</sup>, Lucas Wahl<sup>1</sup>, Christian van der Zalm<sup>1</sup>, Hanna IJspeert<sup>2</sup>, P. Martin van Hagen<sup>2,4</sup>, Nico J.M. van Beveren<sup>5</sup>, Sandra M. Arend<sup>6</sup>, Klaus Okkenhaug<sup>7</sup>, Johan J.M. Pel<sup>1</sup>, Virgil A.S.H. Dalm<sup>2,4,8</sup> and Aleksandra Badura<sup>1</sup>

<sup>1</sup> Department of Neuroscience, Erasmus MC, Rotterdam, The Netherlands

<sup>2</sup> Department of Immunology, Erasmus MC, Rotterdam, The Netherlands

<sup>3</sup> Department of Pediatrics, Erasmus MC, Rotterdam, The Netherlands

<sup>4</sup> Division of Clinical Immunology, Department of Internal Medicine, Erasmus MC, Rotterdam, The Netherlands

<sup>5</sup> Department of Psychiatry, Erasmus MC, Rotterdam, The Netherlands

<sup>6</sup> Department of Infectious Diseases, Leiden University Medical Center, Leiden, The Netherlands

<sup>7</sup> Department of Pathology, University of Cambridge, Cambridge, United Kingdom

<sup>8</sup> Academic Center for Rare Immunological Diseases (RIDC), Erasmus MC, Rotterdam, The Netherlands

**Correspondence:** Aleksandra Badura ([a.badura@erasmusmc.nl](mailto:a.badura@erasmusmc.nl))  
Department of Neuroscience, Erasmus MC  
Wytemaweg 80, 3015 CN Rotterdam  
tel: 0031-(0)10-7043309

**Conflict of interest statement:** PMH has received grants and research support from Takeda, CSL Behring, Abbvie, Lamepro, Novartis Nederland, and honoraria or consultation fees from UCB Pharma. The other authors have no conflict of interest to declare.

1 **Abstract**

2

3 The phosphoinositide-3-kinase (PI3K) family plays a major role in cell signalling and is  
4 predominant in leukocytes. Gain-of-function (GOF) mutations in the *PIK3CD* gene lead to the  
5 development of activated PI3K $\delta$  syndrome (APDS), a rare primary immunodeficiency disorder.

6 A subset of APDS patients also displays neurodevelopmental delay symptoms, suggesting a  
7 potential role of *PIK3CD* in cognitive and behavioural function. However, the extent and nature  
8 of the neurodevelopmental deficits has not been previously quantified. Here, we assessed the  
9 cognitive functions of two APDS patients, and investigated the causal role of the *PIK3CD* GOF

10 mutation in neurological deficits using a murine model of this disease. We used E1020K  
11 knock-in mice, harbouring the most common APDS mutation in patients. We found that APDS  
12 patients present with visuomotor deficits, exacerbated by autism spectrum disorder  
13 comorbidity, whereas p110 $\delta$ <sup>E1020K</sup> mice exhibited impairments in motor behaviour, learning

14 and repetitive behaviour patterning. Our data indicate that *PIK3CD* GOF mutations increase  
15 the risk for neurodevelopmental deficits, supporting previous findings on the interplay between  
16 the nervous and the immune system. Further, our results validate the knock-in mouse model,  
17 and offer an objective assessment tool for patients that could be incorporated in diagnosis and

18 in the evaluation of treatments.

19

20

21

22

23

24

25

26

27

28

## 29 Introduction

30 Primary immunodeficiencies (PID) encompass a group of heterogeneous, mostly  
31 inheritable, disorders that affect distinct components of the immune system (1,2). Common  
32 manifestations of PID include increased susceptibility to infection, autoimmune disease, auto-  
33 inflammatory complications and malignancies, ultimately leading to increased morbidity and  
34 mortality rates (3–6). Activated PI3K delta (PI3K $\delta$ ) syndrome (APDS) is a rare monogenic PID,  
35 caused by heterozygous mutations in either the *PIK3CD* or *PIK3R1* genes, encoding the  
36 p110 $\delta$  catalytic subunit or the p85 $\alpha$  regulatory subunit of PI3K $\delta$ , respectively (7). The most  
37 commonly detected variants in APDS patients are the E1021K substitution in p110 $\delta$ , leading  
38 to APDS1, and the 434-475 deletion in p85 $\alpha$ , resulting in APDS2 (8,9). Both mutations lead to  
39 gain-of-function (GOF) of PI3K $\delta$  and overactivation of the downstream AKT/mTOR cascade  
40 (10–13). In the immune system, PI3K $\delta$  GOF leads to skewed B cell populations towards a  
41 transitional phenotype, decreased numbers of naïve T cells and increased senescent T cells,  
42 resulting in impaired vaccine responses and overall immune dysfunction (11,14,15).  
43 Consequently, APDS patients present with recurrent infections, lymphoproliferation,  
44 autoinflammatory disease and lymphoma (8,9).

45 Although predominantly expressed in peripheral blood mononuclear cells (16), PI3K $\delta$   
46 is also detected in murine (12,17) and human (12,18) brain tissue. In the CNS, the  
47 PI3K/AKT/mTOR axis has been shown to play a crucial role in neuronal differentiation and  
48 migration (19,20). Accordingly, mutations along this pathway have been commonly associated  
49 with neurodevelopmental and neuropsychiatric disorders (21). Although few studies have  
50 focused on the specific role of distinct PI3K isoforms in the CNS, PI3K $\delta$  has been proposed  
51 to regulate soma size, dendritic complexity and spine number (12,22,23), suggesting a  
52 contributing role towards neuronal morphology. Interestingly, 19-31% of APDS patients were  
53 reported to exhibit neurodevelopmental delay (8,9). However, the lack of systematic cognitive  
54 evaluation in these reports hinders the quantitative study of PI3K $\delta$  on neurological function.  
55 Nonetheless, this putative behavioural role of PI3K $\delta$  is further implied by the report of  
56 increased p110 $\delta$  expression in a person with autism spectrum disorder (ASD) (24).

57           In this work, we investigated the role of PI3K $\delta$  in motor and cognitive behaviour. We  
58 describe two related APDS patients and report, for the first time, a case of APDS-associated  
59 ASD. APDS patients presented with deficits in visuomotor integration, particularly in inhibition-  
60 recruiting and memory tasks, accentuated by the ASD phenotype in one of them. Additionally,  
61 we conducted an extensive battery of behavioural tests in an APDS mouse model (11), and  
62 show that p110 $\delta^{E1020K}$  mice present with changes in locomotion, learning and repetitive  
63 behaviour patterning. Taken together, our data suggest that PI3K $\delta$  GOF increases the risk of  
64 atypical behavioural development, supporting previous findings on the interplay between the  
65 CNS and the immune system.

66

67

68

69 **Results**

70

71 ***Immunological profile and neuropsychiatric manifestations of APDS patients***

72

73 We present a 29-year-old male patient, P1, the second child of non-consanguineous  
74 parents of Caucasian descent (P2) (Table 1, 2) (15). Since the age of 9 months, P1 suffered  
75 from recurrent upper and lower respiratory tract infections and diarrhoea. At the age of 3.5  
76 years, P1 was hospitalized for generalized lymphadenopathy due to EBV infection. He was  
77 subsequently diagnosed with common variable immunodeficiency, based on low serum IgG  
78 and IgA levels (with elevated IgM levels), and recurrent infectious complications for which  
79 intravenous immunoglobulin replacement therapy was initiated. At the age of 7, P1 developed  
80 auto-immune complications, including cutaneous manifestations, fever, arthritis, anaemia,  
81 thrombocytopenia and hepatosplenomegaly, with positive antinuclear antibody and anti-  
82 dsDNA titres, described as systemic lupus erythematosus (SLE)-like disease, for which  
83 immunosuppressive therapy was initiated. Other complications included liver cirrhosis due to  
84 auto-immune hepatitis with portal hypertension, requiring liver transplantation in December  
85 2020. At age 22, genetic testing revealed a c.3061 G>A mutation in the *PIK3CD* gene,  
86 resulting in an E1021K substitution and APDS1 (25,26).

87 Besides this immunological phenotype, we also observed neuropsychological deficits  
88 in P1. Psychomotor developmental delay was present, as the patient started walking at the  
89 age of 2 and speaking at age 2.5. At age 6, ASD was considered and P1 was referred to  
90 special needs education. At the age of 9 years, intelligence quotient testing indicated a score  
91 of 80. Moreover, P1 showed persistent deficits in social interaction, motor function and a  
92 distinct fascination for watches, calendars and dates. P1 was diagnosed with pervasive  
93 developmental disorder not otherwise specified at age 10, and re-evaluation in 2020 confirmed  
94 the diagnosis of ASD based on psychiatric examination and on the autism-spectrum quotient  
95 (27). To date, P1 requires assistance with tying shoelaces and buttoning his shirts.

96 Patient 2 (P2), who has been previously described (15), is a non-consanguineous  
97 parent from P1. Genetic testing revealed a c.3061 G>A mutation in the *PIK3CD* gene, resulting  
98 in the E1021K substitution, which was also found in P1. P2 suffered from recurrent upper and  
99 lower respiratory tract infections since childhood and was diagnosed with an IgG2 and IgG4  
100 subclass deficiency. She then commenced immunoglobulin replacement therapy and has  
101 been on intravenous treatment since. A recent CT-scan showed bronchiectasis. There have  
102 been no signs of hepatosplenomegaly nor lymphadenopathy. Currently, her clinical phenotype  
103 is relatively mild, with no recurrence of severe infections, no auto-immune complications, no  
104 inflammatory disease and no haematological malignancy. She was never diagnosed with a  
105 neurodevelopmental condition.

106

#### 107 ***APDS patients present with deficits in visuomotor integration***

108

109 Previous clinical descriptions of APDS reported the presence of cognitive impairment,  
110 developmental delay or speech delay in a number of patients (8,9). Given the formal diagnosis  
111 of ASD in P1, and its association with attention and motor performance (28–30), we conducted  
112 a series of tests to evaluate visuomotor performance in both patients (Fig. 1a-c).

113 Visual reflexive behaviour, primarily driven by parietal eye field and brainstem functions  
114 (31,32), was intact in both patients, with performance in the pro-saccade test equal between  
115 P1, P2 and their respective age-matched controls (performance: 100% for all groups) (Fig.  
116 2a). While pro-tapping performance was also similar for all cohorts (performance: 100% for all  
117 groups), P1 exhibited increased hand latency compared to the other groups. Specifically, P1  
118 average latency was over 4.5 SD higher than the age-matched control group (C1) (P1 = 463  
119 ms, C1 = 391 ± 16 ms, P2 = 400 ms, C2 = 403 ± 33 ms) (Fig. 2a, c).

120 To understand whether this increased hand latency was due to a motor impairment or  
121 rather a consequence of increased task complexity, motor command and execution were  
122 tested in the trajectory prediction test (Fig. 1c). Both patients exhibited similar latencies in  
123 decisive saccades towards the target basket, indicating that the task was correctly understood

124 (P1 = 513 ms; P2 = 570 ms; C = 539 ms). Average hand latency was also similar for both P1  
125 and P2 when compared to control groups, suggesting intact preparation and onset of motor  
126 response (P1 = 779 ms; P2 = 761 ms; C = 767 ms). However, while P2 exhibited similar  
127 performance to controls, P1 presented with a reduction in the percentage of correct trials (P1  
128 = 78%, P2 = 100%, C = 96%) (Fig. 2f). Moreover, both APDS patients adopted a less  
129 systematic strategy to follow the ball's trajectory compared to controls, exhibiting less goal-  
130 directed scan paths and more irregular eye gaze (Fig. 2f). These data suggest that, while  
131 preparation and onset of motor responses appear to be intact in both patients, increased task  
132 speed and complexity likely impairs integration, particularly in P1.

133 We next tested volitional inhibitory behaviour using the anti-saccade and anti-tapping  
134 tests (Fig.1a, b). Both tests require a suppression of reflexive pro-saccades and engage a  
135 complex network of brain regions, including dorsolateral prefrontal cortex, frontal eye fields,  
136 and supplementary eye fields, basal ganglia, superior colliculus and cerebellum (33–35). The  
137 anti-saccade task has been used to characterize cognitive impairments in patients with  
138 schizophrenia (36,37), dementia (38), Parkinson's disease (39) and cerebellar atrophies (40).

139 In the anti-saccade and anti-tapping tests, both APDS patients underperformed  
140 controls (anti-saccade performance: P1 = 43%, C1 = 89%, P2 = 50%, C2 = 74%; anti-tapping  
141 performance: P1 = 31%, C1 = 88%, P2 = 50%, C2 = 83%) (Fig. 2a). While patient eye latency  
142 was faster when compared to respective controls (P1 = 329 ms, C1 = 344 ± 33 ms, P2 = 414  
143 ms, C2 = 490 ± 23 ms), indicative of frontal inhibition deficits (41), P1 hand latency was  
144 increased during tapping (P1 = 514 ms vs C1 = 462 ± 33 ms; 1.6 SD difference). P2 presented  
145 delayed hand execution time (time between screen bar release to target) (P2 = 992ms vs C2  
146 = 132 ± 35ms; > 24.5 SD difference) combined with faster hand latency (P2 = 398 ms vs C2  
147 = 636 ± 23 ms) (Fig. 2b, d). Together, our data show that P1 presents with movement  
148 integration deficits while P2, despite better performance to age-matched controls, exhibits  
149 delayed movement execution.

150 To further evaluate integration deficits, both patients performed a spatial memory task  
151 requiring both inhibition and memory retrieval (Fig. 1a, b). While performance in the memory-

152 saccade task was similar for all groups (P1 = 75%, C1 = 79%, P2 = 75%, C2 = 85%) (Fig.  
153 2a), both patients exhibited delayed eye latency (P1 = 483 ms, C1 = 406 ± 17 ms; > 4.5 SD  
154 difference, P2 = 524 ms, C2 = 449 ± 24 ms; > 3 SD difference) (Fig. 2b). In line with the anti-  
155 tapping task, P1 presented with increased hand latency, compared to controls (P1 = 678 ms  
156 vs C1 = 524 ± 21 ms; > 7 SD difference) whereas P2 exhibited severely delayed hand  
157 execution time (P2 = 919 ms vs C2=146 ± 39 ms; > 19.5 SD difference) (Fig. 2e). These  
158 results show that, while target location was remembered by both patients, in addition to the  
159 aforementioned motor integration deficits, recalling target position was delayed.

160

### 161 ***PI3Kδ is expressed in adult mouse brain***

162

163 Our patient data suggested that *PIK3CD* GOF increased the risk of neuropsychiatric  
164 dysfunction, supporting previous reports (8,9). To fully characterize the extent of neurological  
165 deficits and establish an animal model to test future pharmacological interventions, we  
166 resorted to a heterozygous mouse model of APDS (E1020K knock-in mouse, further referred  
167 to as “p110δ<sup>E1020K</sup> mice”) (11), to explore the effects of *Pik3cd* GOF on behaviour.

168 Prior work in WT mice with a lacZ-*p110δ* reporter indicated the presence of p110δ in  
169 adult brain, predominantly in the cortex and hippocampus (17). Supporting these results, we  
170 detected an 110 kDa band in both WT and p110δ<sup>E1020K</sup> brain tissue (Supplementary Fig. 1).  
171 p110δ was highly expressed in the spleen, as expected due to abundant B cell populations  
172 (42). In the brain, we found lower expression levels of p110δ, primarily detected in the cortex,  
173 hippocampus and olfactory bulbs (Supplementary Fig. 1).

174

### 175 ***p110δ<sup>E1020K</sup> mice exhibit intact gross motor skills but altered locomotion pattern***

176

177 Having confirmed the expression of PI3Kδ in the brain, we proceeded with behaviour  
178 testing. We first assessed motor performance, which is found to be impaired in a number of  
179 patients with neurodevelopmental delay, particularly ASD (43,44). Spontaneous locomotion



180 was tested in the open-field arena (Fig. 3a). Both WT and p110 $\delta^{E1020K}$  mice moved more during  
181 the first 10 mins of exploration (Supplementary Fig. 2a), with mean speed and distance  
182 travelled across the total 30 mins of testing similar between genotypes (speed:  $t(28) = 0.5494$ ,  
183  $p = 0.59$ ; distance:  $t(28) = 1.234$ ,  $p = 0.22$ ) (Fig. 3b,c). PI3K $\delta$  mutation also did not affect  
184 performance on the rotarod test (Fig. 3d) (main effect of genotype,  $F(1,28) = 0.1789$ ,  $p = 0.68$ ),  
185 indicating that p110 $\delta^{E1020K}$  mice have no gross motor defects.

186 To investigate fine motor skills, mice were tested with the Erasmus ladder, a fully  
187 automated behavioural apparatus that allows detailed analysis and quantification of motor  
188 performance and learning in mice (45). p110 $\delta^{E1020K}$  mice spent significantly less time crossing  
189 the ladder on the first two days of testing (Day 1:  $U = 60$ ,  $p = 0.05$ ; Day 2:  $U = 40$ ,  $p = 0.01$ )  
190 (Fig. 3e). This was not prompted by a higher efficiency in crossing the ladder, as the  
191 percentage of missteps was similar for each day in both genotypes (main effect of genotype:  
192  $F(1,28) = 1.786$ ,  $p = 0.19$ ) (Supplementary Fig. 2c). We next analysed the locomotion pattern  
193 on the ladder (Fig. 3f). Although WT and p110 $\delta^{E1020K}$  had identical percentages of backsteps  
194 ( $F(1,28) = 2.784$ ,  $p = 0.11$ ) and longsteps ( $F(1,28) = 0.4735$ ,  $p = 0.50$ ), p110 $\delta^{E1020K}$  mice  
195 displayed a tendency to use a higher percentage of short steps ( $F(1,28) = 3.469$ ,  $p = 0.07$ )  
196 and used fewer jumps ( $F(1,28) = 4.112$ ,  $p = 0.05$ ) to cross the ladder (Fig. 3g). These pattern  
197 changes were independent of weight as this progressed similarly between groups  
198 (Supplementary Fig. 3).

199 Together, these results indicate that PI3K $\delta$  GOF mutation has no impact on gross  
200 motor function, but contributes to changes in fine locomotor skills that result in the adoption of  
201 a different locomotion strategy by mutant mice. This is in line with the findings in our patients,  
202 who do not present with gross motor function impairments either, but do present with fine-  
203 motor movement impairments.

204

205 **p110 $\delta^{E1020K}$  mice show altered patterns of repetitive behaviour independent of anxiety-**  
206 **like measures**

207

208 PIDs predispose patients to an increased prevalence of mood disorders (46), as does  
209 the presence of developmental delays (47,48). To further investigate anxiety-like behaviour in  
210 p110 $\delta$ <sup>E1020K</sup> mutants, we tested mice in the open-field (OF) and elevated-plus maze (EPM)  
211 tests.

212 In the OF, we found no evidence of increased anxiety-like behaviour in p110 $\delta$ <sup>E1020K</sup>  
213 mice, as both genotypes spent comparable time in the inner and outer areas of the arena (In:  
214 U = 67, p = 0.10; Out: U = 103, p = 0.71), as well as in the corners (U = 111, p = 97) (Fig. 4a,b,  
215 Supplementary Fig.2b). There was also no effect of genotype in the EPM regarding the time  
216 spent on the different arms of the maze (F(1,28) = 0.10, p = 0.75) or the number of transitions  
217 between arms (F(1,28) = 3.18, p = 0.09) (Fig. 4c,d). These data indicate that p110 $\delta$ <sup>E1020K</sup> mice  
218 do not exhibit increased anxiety despite their immunological phenotype (11).

219 We next explored the presence of repetitive behaviours, a common comorbidity of  
220 neurodevelopmental delays (49). Using the marble burying task (Supplementary Fig. 4a,b),  
221 we first measured the total area buried by each mouse and found this to be similar between  
222 genotypes (area buried: t(26) = 0.43, p = 0.67 ; number of buried marbles: t(26) = 0.00, p >  
223 0.99) (Fig. 4e, Supplementary Fig. 4c). When the location of the buried marbles was mapped,  
224 we found that WT mice preferably buried marbles in the bottom right corner and centre, while  
225 p110 $\delta$ <sup>E1020K</sup> mice favoured areas close to the walls of the arena (Fig. 4f), indicating increased  
226 thigmotactic behaviour.

227 As the previous results suggested the presence of a distinct repetitive behaviour  
228 pattern, we further addressed this using the grooming assay. The total time spent grooming  
229 was similar between groups (t(28) = 0.96, p = 0.34) (Fig. 4g), as was the total number of  
230 grooming bouts (t(28) = 1.65, p = 0.11) (Fig. 4h) and latency to initiate grooming behaviour  
231 (t(28)=0.25, p = 0.81) (Supplementary Fig. 4d). We found a tendency for the average time  
232 interval between grooming bouts to be smaller in p110 $\delta$ <sup>E1020K</sup> mice (t(28) = 1.98, p = 0.06) (Fig.  
233 4i, j), further suggesting a difference in behaviour pattern between groups. Indeed, a significant  
234 interaction between genotype and short and long grooming bouts (genotype x type of bout:  
235 F(1,28) = 5.31, p = 0.03) revealed that p110 $\delta$ <sup>E1020K</sup> mice exhibited a higher prevalence of short

236 bouts compared to WT, while the opposite was observed for the long bouts (short bouts:  
237 13.29% in WT vs 19.46% in p110δ<sup>E1020K</sup>; long bouts: 86.71% in WT vs 80.54% in p110δ<sup>E1020K</sup>)  
238 (Supplementary Fig. 4e). Furthermore, when the number of grooming bouts was analysed  
239 over time, a tendency for increased bout number over time was seen in p110δ<sup>E1020K</sup> mice  
240 towards the end of the assay (genotype x time: F(9,251)=2.15, p = 0.03) (Fig. 4k, bottom  
241 curve). A significant time x genotype interaction was also found for the 3 minute-binned time  
242 spent grooming (F(9,273) = 3.51, p = 0.0004) (Fig. 4k, top curve), further supporting the  
243 presence of an altered grooming pattern in p110δ<sup>E1020K</sup> mice. Taken together, these data  
244 indicate that, despite the absence of increased anxiety-like behaviour, p110δ<sup>E1020K</sup> mice  
245 present with subtle alterations in the pattern of repetitive behaviour.

246

#### 247 ***p110δ<sup>E1020K</sup> mice exhibit changes in associative response***

248

249 Given the cognitive impairments and learning difficulties presented by some APDS  
250 patients (7,9), including P1, we investigated associative and spatial learning in the p110δ<sup>E1020K</sup>  
251 mice.

252 First, we quantified learning using the Erasmus ladder. During the Erasmus ladder  
253 task, two stimuli are presented. Initially, a light turns on inside the goal box. Next, an air stream  
254 encourages the mouse to enter the ladder (45) (Fig. 5a). Considering the exit frequency for  
255 each stimulus, we found that both genotypes responded similarly to stimuli in the first sessions  
256 of the task. For sessions 3 and 5, p110δ<sup>E1020K</sup> mice left the goal box less frequently with the  
257 air stimulus than WT (session 3: U = 61, p = 0.03; session 5: U = 55.5, p = 0.02) (Fig. 5b),  
258 while increasing box exits after light presentation in later sessions (session 4: U = 63.5, p =  
259 0.07; session 5: U = 63.5, p = 0.04) (Fig. 5c,e). Increased light exit frequency could be  
260 representative of increased readiness or impulsivity to leave the box, interrupting the pre-  
261 stimulus waiting period. From testing days 1 to 4, both genotypes left the box before cue  
262 presentation with similar frequencies (Fig. 5d). On day 5, this frequency was increased in  
263 p110δ<sup>E1020K</sup> mice (session 5: U = 60.5, p = 0.05). As expected, there was a positive association

264 between leaving before cue and the light/air exit ratio (WT:  $\rho = 0.49$ ,  $p < 0.0001$ ; p110 $\delta^{E1020K}$ :  
265  $\rho = 0.63$ ,  $p < 0.0001$ ). Least squares fitting demonstrated that the response of the two  
266 genotypes to the stimuli was significantly different ( $F(2,139)=3.906$ ,  $p = 0.02$ ; WT:  $y =$   
267  $4.9x+3.8$ ; p110 $\delta^{E1020K}$ :  $y = 2.3x+4.5$ ) (Fig. 5f).

268 To further explore learning behaviour, we used the water Y-maze (Fig. 5g), a test often  
269 used to study repetitive behaviour and cognitive flexibility in ASD-mouse models (50–52).  
270 Similar to the previous OF and Rotarod results, we found no evidence of motor dysfunction,  
271 with both genotypes swimming similar distances and at comparable speeds during the  
272 habituation phase (distance:  $U = 67$ ,  $p = 0.22$ ; speed:  $U = 77$ ,  $p = 0.23$ ) (Supplementary Fig.  
273 5a,b). During the acquisition and test phases, both WT and p110 $\delta^{E1020K}$  mice learned the  
274 platform location, and there was no difference in the number of correct arm choices made by  
275 each genotype (Fig. 5i,j). When the location of the platform was reversed, p110 $\delta^{E1020K}$  mice  
276 presented with a lower cumulative median of correct choices per trial, taking longer to perform  
277 the task correctly (Fig. 5k). No significant differences were found in the total number of correct  
278 choices per session (Fig. 5l). Similar results were obtained regarding the reversal II phase  
279 (Supplementary Fig. 5d,e). However, in this phase, errors in platform arm choice were only  
280 performed by p110 $\delta^{E1020K}$  mice ( $U = 45.5$ ,  $p = 0.01$ ) (Supplementary Fig. 5e). Taken together,  
281 these results indicate that p110 $\delta^{E1020K}$  mice present with mild deficits in paired-stimulus  
282 learning and reversal learning.

283

#### 284 ***p110 $\delta^{E1020K}$ mice display intact social interaction behaviour***

285

286 Atypical development of social skills and interactions is a common component of  
287 neuropsychiatric conditions, particularly of those with ASD comorbidity (53,54). Therefore, we  
288 sought to evaluate the performance of p110 $\delta^{E1020K}$  mice in a social interaction paradigm (55).

289 During baseline exploration of the three-chamber apparatus, when no social stimulus  
290 was presented, both genotypes displayed a similar ambulatory behaviour across all chambers  
291 ( $F(1,28) = 0.5376$ ,  $p = 0.47$ ) (Supplementary Fig. 6a,c). p110 $\delta^{E1020K}$  mice displayed slightly

292 altered exploratory behaviour, with a tendency for centre crossing avoidance (genotype x  
293 chamber:  $F(2,55) = 2.988$ ,  $p = 0.06$ ; WT mean centre transitions = 46.57 vs p110 $\delta^{E1020K}$  mean  
294 centre transitions = 38.40) (Supplementary Fig. 6d). During the test phase, a novel mouse  
295 was introduced to the arena (Fig. 6a). Both WT and p110 $\delta^{E1020K}$  mice spent more time in the  
296 chamber where the novel mouse was located (main effect of chamber:  $F(1,911,79.30) = 87.71$ ,  
297  $p < 0.0001$ ; main effect of genotype:  $F(1,83) = 0.0006$ ,  $p = 0.98$ ) (Fig. 6b), increasing the time  
298 spent in this chamber compared to their correspondent baseline values (main effect of phase:  
299  $F(1,28) = 98.74$ ,  $p < 0.0001$ ; main effect of genotype:  $F(1,28) = 0.2441$ ,  $p = 0.63$ ) (Fig. 6c).  
300 Similar to what was found for the baseline exploration period, the avoidance of central area  
301 crossings in p110 $\delta^{E1020K}$  mice persisted in the test phase (genotype x chamber:  $F(2,54) =$   
302  $5.423$ ,  $p = 0.01$ ; WT mean centre transitions = 27.21 vs p110 $\delta^{E1020K}$  mean centre transitions =  
303 23.64) (Supplementary Fig. 6e).

304 Focusing on the region of interest defined around the empty cup and the cup with the  
305 novel mouse, both genotypes demonstrated a comparable preference for interacting with the  
306 cup where the social stimulus was located ( $t(28) = 0.99$ ,  $p = 0.33$ ), spending approximately  
307 twice the time exploring this cup compared to the empty cup (Fig. 6d,e). This preference for  
308 social cup exploration was also accompanied by an increased number of transitions into the  
309 novel mouse cup area (main effect of cup:  $F(1,28) = 29.04$ ,  $p < 0.0001$ ) (Fig. 6f, g). For both  
310 genotypes, the time spent exploring the novel social stimulus progressively decreased over  
311 the course of the task (main effect of time:  $F(1,328,118.8) = 5.714$ ,  $p = 0.0002$ ; main effect of  
312 genotype:  $F(1,28) = 0.3303$ ,  $p = 0.57$ ) (Supplementary Fig. 6b). Finally, when social  
313 investigation preference was analysed, p110 $\delta^{E1020K}$  mice exhibited a tendency to spend a  
314 lower proportion of their time in the novel mouse chamber in the proximity of the cup, although  
315 this did not reach the statistical significance threshold ( $t(28) = 1.877$ ,  $p = 0.07$ ) (Fig.6h).  
316 Altogether, these data indicate that, despite a slight centre avoidance phenotype, p110 $\delta^{E1020K}$   
317 mice prefer the social stimulus over the asocial one, exhibiting an unaffected social phenotype.  
318

319 ***Motor, learning and repetitive behaviours best discriminate WT and p110 $\delta$ <sup>E1020K</sup> mouse***  
320 ***populations***

321

322 The analysis of independent readouts for each behaviour revealed a number of  
323 discrete changes in the behavioural pattern of p110 $\delta$ <sup>E1020K</sup> mice. Nonetheless, behaviour is a  
324 dynamic process where small stereotyped modules are often grouped or combined into larger  
325 representations that underlie each individual's phenotype (56,57). To better understand the  
326 most important contributors to the phenotype of p110 $\delta$ <sup>E1020K</sup> mice, we performed linear  
327 discriminant analysis (LDA) on all behavioural variables measured (58,59). This type of  
328 analysis allows for encompassing individual differences across individuals and captures stable  
329 traits best separating the genotypes across many tests (59). We then selected the first two  
330 dimensions, LD1 and LD2 (Fig. 7a), and plotted the 10 best contributing components of each  
331 discriminant, as these are the variables that give the most information on group separation  
332 (Fig. 7b).

333 LDA of the behavioural data classified individual points into 2 non-overlapping classes,  
334 identifying the two genotypes. The 2 best LDs represent 68.1% of data variation, with LD1,  
335 which explains 41.7% of total data variation, creating a maximal separation between classes.  
336 Focusing on the greatest weights, motor and learning related variables (*time on ladder* and  
337 *light to air ratio*, respectively) contribute the most for group classification. The third feature,  
338 *total grooming time*, with an absolute contribution of 8.5%, indicates that additional group  
339 separation is achieved by the inclusion of repetitive behaviours in this discriminant. Further  
340 separation of the data along the vertical axis is provided by LD2, albeit with lower contributions  
341 (26.4%). This discriminant represents parameters predominantly influenced by locomotion-  
342 derived features. These include total distance travelled and transitions made during the test  
343 phase of the SI, and total distance travelled during the EPM. Altogether, these results indicate  
344 that LDA compiles and captures behavioural alterations in locomotor performance, learning  
345 and repetitive behaviours between WT and p110 $\delta$ <sup>E1020K</sup> mice, supporting the previously  
346 identified univariate analysis findings.

347 **Discussion**

348

349 The study of the immune system in the regulation of neurodevelopment and in shaping  
350 subsequent behaviour is a rapidly emerging field, involving crosstalk in  
351 immunoneuropsychiatry and new integrative therapeutic approaches (60–62). In this work, we  
352 investigated neurologically-relevant behavioural features in APDS, a rare PID, using both  
353 patient data and a murine model. To our knowledge, this is the first study of APDS which  
354 specifically focuses on its behavioural component.

355 APDS patients exhibited changes in visuomotor responses, with P1 presenting with  
356 motor integration deficits, while both patients displayed decreased memory recall capacity.  
357 Additionally, P1 was also formally diagnosed with ASD, strengthening on previous more  
358 general reports describing neurodevelopmental delay as a comorbidity of APDS patients  
359 (8,9,13,63). In the p110 $\delta$ <sup>E1020K</sup> murine model, we detected more subtle phenotypic alterations.  
360 GOF mice presented with altered patterns of locomotion and repetitive behaviours, features  
361 reminiscent of symptoms found in individuals with ASD (49,64).

362 While our data supported a role of *PIK3CD* GOF on behaviour, the precise function of  
363 PI3K $\delta$  in the brain remains elusive. In mice, p110 $\delta$  has been found in brain and spinal cord,  
364 and proposed to have a role in neuronal morphology (12,17,22,23). Although the expression  
365 pattern of human *PIK3CD* follows a similar distribution as in mice (Allen Human Brain Atlas  
366 (2010)), reports of its non-immunological functions are scarce, with only a few studies  
367 implicating this isoform in schizophrenia and autism (18,24,65). The presence of behavioural  
368 deficits in adult mice combined with the low PI3K $\delta$  expression in the brain, suggests that this  
369 isoform might have a predominant function during brain development rather than adulthood.  
370 Consistent with this hypothesis, recent studies found more *PIK3CD* transcripts in human foetal  
371 brain than in adult samples (18) and distributed expression of *PIK3CD* in the developing  
372 mouse brain (66). Combined with the fact that PI3K $\delta$  lies upstream of the mTOR pathway, a  
373 signalling hub that is highly active during brain development and often found to be  
374 dysregulated in neurodevelopmental disorders (19,67,68), this expression suggests that



375 *PIK3CD* plays a still unexplored role in the modulation of brain development, adding to the  
376 growing body of evidence pointing to a critical period for ASD development (52,69).

377         Despite its presence in the brain, PI3K $\delta$  is predominantly expressed in leukocytes. This  
378 supports a putative modulatory role of the immune system on behaviour. Accordingly, a  
379 number of studies has now suggested a link between neurodevelopmental and immunological  
380 dysregulation. For example, in rodents, externally triggering a maternal immune response  
381 during pregnancy induces behavioural alterations in adult offspring. These include reduced  
382 cognitive flexibility and decreased social exploration, traits of an ASD-like phenotype (70–72).  
383 In humans, increased odds of neonatal infections were reported for children with ASD (73).  
384 Additionally, viral or bacterial infections during pregnancy were associated with an increased  
385 likelihood of ASD diagnosis (74,75), whereas increased ASD symptom severity was found in  
386 children with a maternal history of chronic immune activation (76). In APDS, family history of  
387 immunodeficiency is also estimated in 39% of patients (7), thus suggesting that PID might be  
388 an important predictor of neuropsychiatric load. Strengthening the hypothesis of an  
389 *immunological-behavioural phenotype* relationship is the presentation of the described  
390 patients, with P1 displaying increased immunodeficiency and visuomotor impairments, in  
391 addition to an ASD diagnosis, when compared to P2. Overall, the indirect links between  
392 immune and neuropsychiatric dysfunction indicates that immunological burden may be an  
393 important predictor for the development of atypical behaviour, not only in APDS, but also in  
394 other PID (77,78).

395         Interestingly, in individuals with ASD and ASD animal models, altered microbiota has  
396 been reported, with studies describing lower diversity profiles of colonizing microbiota in these  
397 groups (79–82). Highlighting a putative ASD-microbiota relationship, a recent follow-up study  
398 on microbial transfer therapy reported that ASD participants still scored 47% lower than  
399 baseline on the Childhood Autism Rating Scale and 35% lower on the Aberrant Behavior  
400 Checklist two years after trial conclusion, suggesting that microbiota regularization may  
401 improve autism-related scores on a longer term (83). Importantly, preclinical evidence  
402 suggests that PI3K $\delta$  may play a role in microbiota regulation. Indeed, *Pik3cd*<sup>E1020K/+</sup> mice were



403 shown to exhibit increased antibody production and reactivity against autologous commensal  
404 bacteria (84), whereas mice with PI3K $\delta$  loss-of-function develop colitis due to pathogenic T  
405 cell responses and altered IL-10 and IL-12p40 production (85,86). Thus, although human data  
406 are essential to further explore these hypotheses, given that 22% to 29% of APDS patients  
407 present with enteropathy (7), it would be important for future PI3K $\delta$  studies to consider its  
408 possible role in microbiota homeostasis.

409         The interplay between the immune system and the brain is a current topic of rapid  
410 scientific discovery (87,88). Here, we show that a heterozygous mouse model of APDS  
411 displays mild behavioural alterations in addition to its immunological phenotype. ADPS  
412 patients showed high levels of heterogeneity when it came to behavioural and immunological  
413 symptoms. However, both P1 and P2 presented with sensorimotor deficits, a feature captured  
414 by the mouse model. Notably, the severity of the symptoms between P1 and P2 was reflected  
415 in the performance during the visuomotor tests. This is of interest to the APDS community,  
416 because such tests have previously been shown to accurately capture the features of early  
417 stage Alzheimer's disease (89), correlate with cognitive impairments in Parkinson's disease  
418 (90), and serve as a tool to monitor the progression of both conditions (91). Further, due to  
419 their non-invasive nature, such tests are suitable to use even in very young children (92). In  
420 the future, we aim to further explore the correlation between immune system impairments,  
421 behavioural deficits and the outcome of the visuomotor deficits, on a larger APDS patient  
422 cohort, assessing the potential benefits of including this type of test batteries in the diagnostic  
423 pathway.

424         In addition to reinforcing the need for a multidisciplinary team assessing APDS  
425 patients, this study highlights the importance of increased monitoring of immunodeficient  
426 patients for the presence of neuropsychiatric comorbidities and describes a set of non-invasive  
427 tools that allow for such assessment. Additional studies on the function of PI3K $\delta$  in the brain  
428 will be fundamental to understand its specific role in neurodevelopment and deepen our  
429 knowledge of the interactions between immunological burden and neuropsychiatric load.

430

431 **Methods**

432 **Patients**

433 We describe two APDS patients (Table 1,2). P1 is regularly followed (by VD) at the Primary  
434 Immunodeficiency Center of the Department of Internal Medicine, Division of Clinical  
435 Immunology, Erasmus MC (Rotterdam, The Netherlands); P2 is currently under treatment (by  
436 SMA) at the outpatient Department of Infectious Diseases of Leiden University Medical Center  
437 (Leiden, The Netherlands). Psychiatric assessment was performed (by NB) at the Erasmus  
438 MC and included the autism-spectrum quotient (27). Additional clinical history and data were  
439 obtained from medical notes (by OM, VD and SMA).

440

441 **Visuomotor coordination and memory assessment**

442 An eye-hand coordination measurement setup was used to quantify the interactions between  
443 visual, ocular motor, and manual motor systems in both spatial and temporal domains. It  
444 consisted of a 21.5" touchscreen monitor (Wacom DTH-2242, Wacom Corporation, Japan), a  
445 remote infrared and screen-based eye-tracker (Tobii Pro X3, Tobii Corporation, Sweden) and  
446 a wired keyboard. The eye-tracker, positioned below the touchscreen, recorded eye  
447 movements at 120Hz and was connected via an external processing unit to a laptop (DELL  
448 Latitude 5590, Dell Technologies, Texas, United States) with an Intel Core i5-8350U  
449 processor, 256 GB SSD, and 16 GB internal RAM to warrant optimal performance and data  
450 quality (Pro, 2017). Eye movements with a speed  $> 50^\circ/\text{s}$  were considered saccades. Manual  
451 responses were captured by sampling alternating presses and releases of the index finger  
452 from the dominant hand, between keyboard and touchscreen. After a short general instruction,  
453 each subject was instructed to sit straight in front of the touchscreen. Eye positions were  
454 calibrated at approximately 65 cm from the touchscreen using a standard calibration  
455 procedure. Next, 7 tasks, 3 eye tasks and 4 eye-hand tasks (Fig. 1), were presented on the  
456 touch screen in a fixed order (see below). Standard verbal instructions were given prior to  
457 each task and each subject was allowed a maximum of three practice trials. These instructions  
458 were also written on the screen (in Dutch). The starting position at each trial was fixating a

459 central white dot and, in case of eye-hand tasks, also touching a blue bar at the bottom of the  
460 screen with the index finger for 2 seconds. The following 16 trials within each task had to be  
461 executed as fast and as accurately as possible. The following tasks were performed:

462 1. Pro-Saccade and 2. Pro-tapping: The subject had to fixate (pro-saccade) or touch (pro-  
463 tapping) a randomly appearing peripheral dot.

464 3. Anti-Saccade and 4. Anti-Tapping: The participant had to make an eye movement (anti-  
465 saccade) or an eye and hand movement (anti-tapping) in the opposite direction of a randomly  
466 appearing peripheral dot, at either 5, 10, 15 or 20 degrees of the horizontal direction.

467 5. Memory-Saccade and 6. Memory-Tapping: While fixating the central dot, a peripheral dot  
468 appeared for 50 ms at a random position. The subject had to fixate (memory-saccade) or touch  
469 (memory-tapping) the remembered peripheral dot location after the central dot disappeared.

470 7. Trajectory Prediction: A ball was dropped in the direction of one of six baskets. Halfway  
471 along the trajectory, the ball became invisible and the subject had to touch the basket in which  
472 the ball would have fallen.

473

#### 474 **Mice procedures**

475 Thirty 10 to 13 week-old wild-type (n = 15 WT) and heterozygous p110 $\delta$ <sup>E1020K</sup> (n = 15  
476 p110 $\delta$ <sup>E1020K</sup>) male mice were kindly provided by Dr. Klaus Okkenhaug (University of  
477 Cambridge, United Kingdom). These mice harbour an E1020K knock-in mutation in the *Pik3cd*  
478 gene expressed in all cells (11). Following arrival to the Erasmus MC, mice were acclimated  
479 to the facilities for two weeks. Mice were group-housed (3 to 4 mice per cage, mixed genotypes  
480 in the same cage), provided with food and water *ad libitum* and kept on a regular 12h light/dark  
481 cycle. After this acclimatization time, mice were handled by the experimenters for three days  
482 prior to experiment initiation. Before each experiment, mice were weighed (Supplementary  
483 Figure 3) and habituated to the testing room for at least 1 h. Experimenters were blinded to  
484 the genotype of each mouse.

485 When all behavioural experiments were completed, brain tissue was collected. Mice were  
486 injected with an overdose of pentobarbital, transcardially perfused with 0,9% NaCl, and the  
487 brain dissected. Tissue was flash frozen and kept at -80°C until used.

488

#### 489 **Genotyping**

490 Mice were genotyped by amplifying the *Pik3cd* locus from mouse ear DNA using the forward  
491 E1020KrecF1 (5'-TCCTCATGGCATCCTTGTCC-3') primer and the reverse E1020Kflox-  
492 recR11 (5'-TGGTCCACCCGTTGACTCAA-3') primer by PCR. PCR products were run on a  
493 1% agarose gel. The wild-type allele resulted in a 381 bp band and the recombined p110 $\delta$ <sup>E1020K</sup>  
494 allele resulted in a 436 bp band.

495

#### 496 **Behavioural testing**

497 All mouse behavioural tasks, except the Erasmus ladder, Rotarod and Y-maze, were  
498 performed in a behavioural box. This consisted of a 130 x 80 x 80 cm wooden box with a door,  
499 lined with 6 mm high-pressure laminate and foam, with a 10 mm Perspex® shelf and  
500 standardized white and infrared lights. Metal grooves on the Perspex® shelf assured constant  
501 positioning of the testing arenas across experiments. All experiments were recorded with a  
502 fixed camera (acA 1300-600gm, Basler AG) positioned above the arenas and operated  
503 through the open-source software Bonsai (<https://bonsai-rx.org>). A frame rate of 25 frames  
504 per second (fps) was used for all tests, except for the Grooming assay and the Y-maze, where  
505 30 fps were used. After behavioural testing, video recordings were uploaded to the open-  
506 source software OptiMouse (93), where each mouse was tracked and measures such as  
507 speed and time spent in regions of interest (ROIs) were extracted. Behavioural tasks were  
508 performed as previously described and in the following order: 1) Erasmus ladder (Noldus,  
509 Wageningen, the Netherlands) (45); 2) Social interaction (52); 3) Grooming (94); 4) Elevated-  
510 plus maze (52); 5) Open-field (95); 6) Marble burying (96); 7) water Y-maze (52); 8) Rotarod  
511 (97). The order of the assays was the same for all mice. For detailed information on each  
512 assay see Supplemental materials.

## 513 **Western blot**

514 Brain tissue was lysed and homogenized in RIPA Lysis and Extraction Buffer (Thermo  
515 Scientific™), supplemented with Halt™ Protease and Phosphatase Inhibitor Cocktail (Thermo  
516 Scientific™). Protein concentration was determined with Pierce™ BCA Protein Assay Kit  
517 (Thermo Scientific™). Protein lysates were mixed with 4X Laemmli Sample Buffer,  
518 supplemented with 2-mercaptoethanol (Bio-Rad Laboratories B.V.) and incubated at 100°C  
519 for 6 min. Eighty µg (brain and spleen tissue of WT and p110δ<sup>E1020K</sup> mice) or 40 µg  
520 (splenocytes of WT and Pik3cd<sup>-/-</sup> mice) of lysate were loaded onto 4-15% Mini-PROTEAN®  
521 TGX™ Precast Protein Gels (Bio-Rad Laboratories B.V.). Transfer was performed onto  
522 Immobilon®-P PVDF Membranes (Merck KGaA). Membranes were blocked with 5% BSA  
523 (Merck KGaA) in TBS (Merck KGaA) for 1 h and subsequently incubated with anti-PI3K p110δ  
524 (D1Q7R) Rabbit mAb (1:1.000, #34050, Cell Signaling Technology, B.V.) in 5% BSA-TBS with  
525 0,1% Tween 20 (TBS-T) (Merck KGaA) overnight at 4°C. Membranes were washed three  
526 times with TBS-T and incubated with IRDye® 800CW Goat anti-Rabbit IgG (1:10.000, H + L;  
527 LI-COR Biosciences - GmbH) in 5%-BSA-TBS-T for 1 h at room temperature. Membranes  
528 were washed three times with TBS-T and imaged in an Odyssey® CLx Imaging System.  
529 Afterwards, membranes were incubated with GAPDH (D16H11) XP® Rabbit mAb (1:1.000  
530 dilution, #5174, Cell Signaling Technology, B.V.) in 5% BSA-TBS-T overnight at 4°C.  
531 Membranes were washed three times with TBS-T and incubated with IRDye® 800CW Goat  
532 anti-Rabbit IgG (1:10.000, H + L; LI-COR Biosciences - GmbH) in 5%-BSA-TBS-T for 1 h at  
533 room temperature. Membranes were washed three times with TBS-T and imaged in an  
534 Odyssey® CLx Imaging System. Western blots were visualized with Image Studio Lite™  
535 software (LI-COR Biosciences - GmbH).

536

## 537 **Linear discriminant analysis**

538 For multivariate analysis, linear discriminant analysis (LDA) was performed to identify the  
539 behavioural features that best separate WT and p110δ<sup>E1020K</sup> genotypes (58,98). All variables  
540 were initially considered for class separation (see pre-processing steps below). Variables that

541 consisted of multiple data points, measured over several sessions (e.g. rotarod data, acquired  
542 over the course of 5 days), were reduced to a single value variable by calculating the slope  
543 across data points, as this can be interpreted as a learning curve of an animal for a given  
544 variable. After pre-processing and validation, LDA was performed with a custom written code.  
545 The outcome from the LDA was plotted as LD1 vs LD2, with the contribution of the 10 best  
546 variables per LD. All code used to perform the pre-processing steps, validation and LDA is  
547 available at [https://github.com/BaduraLab/LDA\\_analysis\\_2](https://github.com/BaduraLab/LDA_analysis_2) classes.

548

#### 549 *Pre-processing*

550 Before conducting the LDA, data were pre-processed to comply with the normality assumption  
551 by calculating z-scores (98). Z-scores were inspected for every variable and compared with a  
552 standard normal distribution. Due to its highly skewed distribution, “Y-maze: reverse II” data  
553 were excluded from further analysis. Class approximation of a normal distribution was also  
554 assessed by visualising and comparing the z-scored data with a standard normal distribution.  
555 Additionally, data points that exceeded 3 scaled median absolute deviations from the median  
556 (*isoutlier* function in Matlab) of the corresponding class per variable, were considered outliers  
557 and excluded from further analysis. Excluded outliers were interpolated with the mean of their  
558 corresponding class per variable (mean interpolation) (98,99).

559 Next, a correlation matrix with all tested behaviours was generated (Supplementary Fig. 7a)  
560 to exclude strongly correlated variables. Inspection of the matrix identified *speed* related  
561 variables as strongly correlated ( $r \geq 0.86$ ) with measures of *total distance* of the corresponding  
562 experiment. Therefore, speed variables were excluded in this step, while distance variables  
563 were kept for further analysis, which resulted in 31 behavioural measures included in the LDA.  
564 Finally, we applied the Moore-Pseudo Inverse method to allow inclusion of all variables in the  
565 analysis by approximating the inverse of the within variance matrix (100). This last step was  
566 necessary because one of LDA’s criteria is that the total number of variables analysed must  
567 be lower or equal to the total number of samples minus the number of classes (98).

568

569 *LDA validation*

570 To validate the results of the LDA, data was shuffled 200.000 by randomizing data labelling.  
571 This number was chosen by shuffling a random dataset  $N$  times until an error margin of under  
572 5% was achieved, based on the concept of a Monte Carlo simulation (101). With each shuffle,  
573 the individual data points were randomly assigned to two equally sized classes. While  
574 dominant features can still appear dominant while shuffling, provided that these variables are  
575 actually not dependent, exactly equal combinations of contributions were predicted to be low  
576 and therefore different from the final LDA results. After shuffling, the first LD1 variable, *Time*  
577 *on ladder (EL)*, appeared 0.21% of the times in 1<sup>st</sup> place, the second variable, *Light/air ratio*  
578 *(EL)*, was above 18.73% of the times in 2<sup>nd</sup> place, and the third variable, *Total time (G)*,  
579 appeared 1.81% of the times in 3<sup>rd</sup> place (Supplementary Fig. 7b). The rank sum of the first  
580 two features appeared 0.013% of times and the rank sum of the first three appeared 0% of  
581 times.

582

583 **Statistics**

584 For the analysis of patient visuomotor data, a customized MATLAB script (Mathworks, Natick,  
585 MA, USA) was used to visually inspect and analyze all the measured trials. Three outcome  
586 measures were considered: 1) Performance - percentage of correctly performed trials; 2) Eye  
587 Latency (EL) - time between the presentation of a peripheral stimulus and initiation of the  
588 primary saccadic eye movement; 3) Hand Latency (HL) - time between the presentation of a  
589 peripheral stimulus and the release of the index finger from the keyboard. The control groups,  
590 C1 and C2, were age-matched to patients P1 and P2, respectively. The age and number of  
591 control patients is presented in Table 3.

592 For mouse behavioural data, statistical analysis involving hypothesis testing and group  
593 comparison was performed with the Graphpad Prism 8 software. Data sets were first tested  
594 for the presence of significant outliers using the Grubbs test, and then for the assumption of  
595 normality, using the Shapiro-Wilk test and Q-Q plots. When normality was followed, WT and  
596 p110δ<sup>E1020K</sup> groups were compared with a two-tailed t-test or a 2-way repeated measures



597 ANOVA, depending on the parameters analysed. When data violated the assumption of  
598 normality, a two-tailed Mann-Whitney test was performed instead. A mixed effects model was  
599 used in place of repeated measures ANOVA when data points were missing or excluded  
600 (outliers). The statistical significance threshold was set at  $p \leq 0.05$ . For the analysis of  
601 automatically tracked behaviour, body position values were used, except for the “near cup”  
602 parameters of the social interaction task. In this case, the nose position was extracted to more  
603 accurately represent the interaction between test and novel mice (*sniffing* the novel mouse).

604

### 605 **Study approval**

606 Patient P1 had previously been recruited for a longitudinal, multi-center, cohort study on the  
607 causes and clinical manifestations of PID. For this study, approval of the Medical Ethics  
608 Committee of the Erasmus University Medical Center Rotterdam had been obtained (MEC  
609 2013-026). Written informed consent was obtained from patients P1 and P2 according to the  
610 Declaration of Helsinki.

611 All experimental animal procedures were approved a priori by an independent animal ethical  
612 committee (DEC-Consult, Soest, The Netherlands), as required by Dutch law and conform to  
613 the relevant institutional regulations of the Erasmus MC and Dutch legislation on animal  
614 experimentation.

615

616

617

618

619

620

621

622

623

624



625 **Author contributions**

626 IS, AB, VASHD and JJMP designed and supervised the study. AB, KO, VASHD, JJMP  
627 provided resources and acquired funding. VASHD, ORM, SMA and NJMB identified patients  
628 and performed clinical diagnosis. IIF, JJMP and AB performed the visuomotor experiments.  
629 IS and LW performed mouse experiments. FMPK and HI performed in vitro experiments. IS,  
630 IIF, LW and CVDZ performed data analysis. IS performed statistical analysis and prepared  
631 figures. IS, AB, VASHD and JJMP wrote the first draft. All authors edited the manuscript.  
632 IS and ORM share first authorship. ORM and VASHD provided the clinical characterisation of  
633 P1 and P2, whereas IS performed all mouse experiments and coordinated visuomotor data  
634 collection and analysis. Because IS drafted the paper, they are listed first.

635

636

637

638

639

640

641

642

643

644

645

646

647

648

649

650

651

652

653 **Acknowledgements**

654 We thank Peter Katsikis for providing splenocytes of WT and *Pik3cd*<sup>-/-</sup> animals; Roxanne ter  
655 Haar and Elize Haasdijk for the biotechnical assistance; and Chris de Zeeuw for helpful  
656 comments and histological reagents. This work has been funded by the Stichting Sophia  
657 Kinderziekenhuis Fonds (grant no. S15-07 Genes and Immunity in SCID- F.M.P.K.) and the  
658 Dutch Research Council (NWO, ZonMw) Talent Programme Vidi (A.B.)

659

660

661

662

663

664

665

666

667

668

669

670

671

672

673

674

675

676

677

678

679

680

681 **References**

- 682 1. Gruber, C. & Bogunovic, D. Incomplete penetrance in primary immunodeficiency: a  
683 skeleton in the closet. *Hum. Genet.* **139**, 745–757 (2020).
- 684 2. Thaventhiran, J. E. D. *et al.* Whole-genome sequencing of a sporadic primary  
685 immunodeficiency cohort. *Nature* (2020). doi:10.1038/s41586-020-2265-1
- 686 3. Amaya-Uribe, L., Rojas, M., Azizi, G., Anaya, J.-M. & Gershwin, M. E. Primary  
687 immunodeficiency and autoimmunity: A comprehensive review. *J. Autoimmun.* **99**, 52–  
688 72 (2019).
- 689 4. Bethune, C. *et al.* British Society for Immunology/United Kingdom Primary  
690 Immunodeficiency Network consensus statement on managing non-infectious  
691 complications of common variable immunodeficiency disorders. *Clin. Exp. Immunol.*  
692 **196**, 328–335 (2019).
- 693 5. Odnoletkova, I. *et al.* The burden of common variable immunodeficiency disorders: a  
694 retrospective analysis of the European Society for Immunodeficiency (ESID) registry  
695 data. *Orphanet J. Rare Dis.* **13**, 201 (2018).
- 696 6. Abolhassani, H. *et al.* Clinical, immunologic, and genetic spectrum of 696 patients with  
697 combined immunodeficiency. *J. Allergy Clin. Immunol.* **141**, 1450–1458 (2018).
- 698 7. Jamee, M. *et al.* Clinical, Immunological, and Genetic Features in Patients with  
699 Activated PI3K $\delta$  Syndrome (APDS): a Systematic Review. *Clin. Rev. Allergy Immunol.*  
700 (2019). doi:10.1007/s12016-019-08738-9
- 701 8. Coulter, T. I. *et al.* Clinical spectrum and features of activated phosphoinositide 3-kinase  
702  $\delta$  syndrome: A large patient cohort study. *J. Allergy Clin. Immunol.* **139**, 597–606.e4  
703 (2017).
- 704 9. Elkaim, E. *et al.* Clinical and immunologic phenotype associated with activated  
705 phosphoinositide 3-kinase  $\delta$  syndrome 2: A cohort study. *J. Allergy Clin. Immunol.* **138**,  
706 210–218.e9 (2016).
- 707 10. Dornan, G. L. *et al.* Conformational disruption of PI3K $\delta$  regulation by immunodeficiency  
708 mutations in PIK3CD and PIK3R1. *Proc. Natl. Acad. Sci. U. S. A.* **114**, 1982–1987

- 709 (2017).
- 710 11. Stark, A.-K. *et al.* PI3K $\delta$  hyper-activation promotes development of B cells that  
711 exacerbate *Streptococcus pneumoniae* infection in an antibody-independent manner.  
712 *Nat. Commun.* **9**, 3174 (2018).
- 713 12. Nieuwenhuis, B. *et al.* PI 3-kinase delta enhances axonal PIP3 to support axon  
714 regeneration in the adult CNS. *EMBO Mol. Med.* e11674 (2020).
- 715 13. Wang, Y. *et al.* Report of a Chinese Cohort with Activated Phosphoinositide 3-Kinase  $\delta$   
716 Syndrome. *J. Clin. Immunol.* **38**, 854–863 (2018).
- 717 14. Thauland, T. J., Pellerin, L., Ohgami, R. S., Bacchetta, R. & Butte, M. J. Case Study:  
718 Mechanism for Increased Follicular Helper T Cell Development in Activated PI3K Delta  
719 Syndrome. *Front. Immunol.* **10**, 753 (2019).
- 720 15. Wentink, M. *et al.* Genetic defects in PI3K $\delta$  affect B-cell differentiation and maturation  
721 leading to hypogammaglobulinemia and recurrent infections. *Clin. Immunol.* **176**, 77–  
722 86 (2017).
- 723 16. Chantry, D. *et al.* p110delta, a novel phosphatidylinositol 3-kinase catalytic subunit that  
724 associates with p85 and is expressed predominantly in leukocytes. *J. Biol. Chem.* **272**,  
725 19236–19241 (1997).
- 726 17. Eickholt, B. J. *et al.* Control of axonal growth and regeneration of sensory neurons by  
727 the p110delta PI 3-kinase. *PLoS One* **2**, e869 (2007).
- 728 18. Hood, V. L., Berger, R., Freedman, R. & Law, A. J. Transcription of PIK3CD in human  
729 brain and schizophrenia: regulation by proinflammatory cytokines. *Hum. Mol. Genet.* **28**,  
730 3188–3198 (2019).
- 731 19. Tee, A. R., Sampson, J. R., Pal, D. K. & Bateman, J. M. The role of mTOR signalling in  
732 neurogenesis, insights from tuberous sclerosis complex. *Semin. Cell Dev. Biol.* **52**, 12–  
733 20 (2016).
- 734 20. Jossin, Y. & Goffinet, A. M. Reelin signals through phosphatidylinositol 3-kinase and Akt  
735 to control cortical development and through mTor to regulate dendritic growth. *Mol. Cell.*  
736 *Biol.* **27**, 7113–7124 (2007).

- 737 21. Costa-Mattioli, M. & Monteggia, L. M. mTOR complexes in neurodevelopmental and  
738 neuropsychiatric disorders. *Nat. Neurosci.* **16**, 1537–1543 (2013).
- 739 22. Hood, V. L., Paterson, C. & Law, A. J. PI3Kinase-p110 $\delta$  Overexpression Impairs  
740 Dendritic Morphogenesis and Increases Dendritic Spine Density. *Front. Mol. Neurosci.*  
741 **13**, 29 (2020).
- 742 23. Schmidt, J. T., Mariconda, L., Morillo, F. & Apraku, E. A role for the polarity complex and  
743 PI3 kinase in branch formation within retinotectal arbors of zebrafish. *Dev. Neurobiol.*  
744 **74**, 591–601 (2014).
- 745 24. Poopal, A. C., Schroeder, L. M., Horn, P. S., Bassell, G. J. & Gross, C. Increased  
746 expression of the PI3K catalytic subunit p110 $\delta$  underlies elevated S6 phosphorylation  
747 and protein synthesis in an individual with autism from a multiplex family. *Mol. Autism* **7**,  
748 3 (2016).
- 749 25. Angulo, I. *et al.* Phosphoinositide 3-kinase  $\delta$  gene mutation predisposes to respiratory  
750 infection and airway damage. *Science* **342**, 866–871 (2013).
- 751 26. Nunes-Santos, C. J., Uzel, G. & Rosenzweig, S. D. PI3K pathway defects leading to  
752 immunodeficiency and immune dysregulation. *J. Allergy Clin. Immunol.* **143**, 1676–1687  
753 (2019).
- 754 27. Baron-Cohen, S., Wheelwright, S., Skinner, R., Martin, J. & Clubley, E. The autism-  
755 spectrum quotient (AQ): evidence from Asperger syndrome/high-functioning autism,  
756 males and females, scientists and mathematicians. *J. Autism Dev. Disord.* **31**, 5–17  
757 (2001).
- 758 28. Del Bianco, T. *et al.* Temporal Profiles of Social Attention Are Different Across  
759 Development in Autistic and Neurotypical People. *Biol Psychiatry Cogn Neurosci*  
760 *Neuroimaging* (2020). doi:10.1016/j.bpsc.2020.09.004
- 761 29. Choi, B., Leech, K. A., Tager-Flusberg, H. & Nelson, C. A. Development of fine motor  
762 skills is associated with expressive language outcomes in infants at high and low risk for  
763 autism spectrum disorder. *J. Neurodev. Disord.* **10**, 14 (2018).
- 764 30. Mous, S. E., Jiang, A., Agrawal, A. & Constantino, J. N. Attention and motor deficits

- 765 index non-specific background liabilities that predict autism recurrence in siblings. *J.*  
766 *Neurodev. Disord.* **9**, 32 (2017).
- 767 31. Müri, R. M., Iba-Zizen, M. T., Derosier, C., Cabanis, E. A. & Pierrot-Deseilligny, C.  
768 Location of the human posterior eye field with functional magnetic resonance imaging.  
769 *J. Neurol. Neurosurg. Psychiatry* **60**, 445–448 (1996).
- 770 32. Van Der Werf, J., Buchholz, V. N., Jensen, O. & Medendorp, W. P. Neuronal  
771 synchronization in human parietal cortex during saccade planning. *Behav. Brain Res.*  
772 **205**, 329–335 (2009).
- 773 33. Everling, S. & Fischer, B. The antisaccade: a review of basic research and clinical  
774 studies. *Neuropsychologia* **36**, 885–899 (1998).
- 775 34. Munoz, D. P. & Everling, S. Look away: the anti-saccade task and the voluntary control  
776 of eye movement. *Nat. Rev. Neurosci.* **5**, 218–228 (2004).
- 777 35. Pierrot-Deseilligny, C., Milea, D. & Müri, R. M. Eye movement control by the cerebral  
778 cortex. *Curr. Opin. Neurol.* **17**, 17–25 (2004).
- 779 36. Nieman, D. *et al.* Antisaccade task performance in patients at ultra high risk for  
780 developing psychosis. *Schizophr. Res.* **95**, 54–60 (2007).
- 781 37. Kang, S. S., Dionisio, D. P. & Sponheim, S. R. Abnormal mechanisms of antisaccade  
782 generation in schizophrenia patients and unaffected biological relatives of schizophrenia  
783 patients. *Psychophysiology* **48**, 350–361 (2011).
- 784 38. Meyniel, C., Rivaud-Péchéux, S., Damier, P. & Gaymard, B. Saccade impairments in  
785 patients with fronto-temporal dementia. *J. Neurol. Neurosurg. Psychiatry* **76**, 1581–1584  
786 (2005).
- 787 39. Waldthaler, J., Tsitsi, P. & Svenningsson, P. Vertical saccades and antisaccades:  
788 complementary markers for motor and cognitive impairment in Parkinson’s disease.  
789 *NPJ Parkinsons Dis* **5**, 11 (2019).
- 790 40. Piu, P. *et al.* The cerebellum improves the precision of antisaccades by a latency-  
791 duration trade-off. *Prog. Brain Res.* **249**, 125–139 (2019).
- 792 41. Muilwijk, D., Verheij, S., Pel, J. J., Boon, A. J. & van der Steen, J. Changes in Timing

- 793 and kinematics of goal directed eye-hand movements in early-stage Parkinson's  
794 disease. *Transl. Neurodegener.* **2**, 1 (2013).
- 795 42. Clayton, E. *et al.* A crucial role for the p110delta subunit of phosphatidylinositol 3-kinase  
796 in B cell development and activation. *J. Exp. Med.* **196**, 753–763 (2002).
- 797 43. Bishop, J. C. & Pangelinan, M. Motor skills intervention research of children with  
798 disabilities. *Res. Dev. Disabil.* **74**, 14–30 (2018).
- 799 44. Mostofsky, S. H. *et al.* Decreased connectivity and cerebellar activity in autism during  
800 motor task performance. *Brain* **132**, 2413–2425 (2009).
- 801 45. Vinueza Veloz, M. F. *et al.* Cerebellar control of gait and interlimb coordination. *Brain*  
802 *Struct. Funct.* **220**, 3513–3536 (2015).
- 803 46. Kayan Ocakoglu, B., Karaca, N. E., Ocakoglu, F. T. & Erermis, S. Psychological burden  
804 of pediatric primary immunodeficiency. *Pediatr. Int.* **60**, 911–917 (2018).
- 805 47. Cross, A. J., Goharpey, N., Laycock, R. & Crewther, S. G. Anxiety as a Common  
806 Biomarker for School Children With Additional Health and Developmental Needs  
807 Irrespective of Diagnosis. *Front. Psychol.* **10**, 1420 (2019).
- 808 48. North, C. R., Wild, T. C., Zwaigenbaum, L. & Colman, I. Early neurodevelopment and  
809 self-reported adolescent symptoms of depression and anxiety in a National Canadian  
810 Cohort Study. *PLoS One* **8**, e56804 (2013).
- 811 49. MacDuffie, K. E. *et al.* Sleep Problems and Trajectories of Restricted and Repetitive  
812 Behaviors in Children with Neurodevelopmental Disabilities. *J. Autism Dev. Disord.*  
813 (2020). doi:10.1007/s10803-020-04438-y
- 814 50. Tsai, P. T. *et al.* Autistic-like behaviour and cerebellar dysfunction in Purkinje cell Tsc1  
815 mutant mice. *Nature* **488**, 647–651 (2012).
- 816 51. Stoodley, C. J. *et al.* Altered cerebellar connectivity in autism and cerebellar-mediated  
817 rescue of autism-related behaviors in mice. *Nat. Neurosci.* **20**, 1744–1751 (2017).
- 818 52. Badura, A. *et al.* Normal cognitive and social development require posterior cerebellar  
819 activity. *Elife* **7**, (2018).
- 820 53. Siegel, M. S. & Smith, W. E. Psychiatric features in children with genetic syndromes:

- 821 toward functional phenotypes. *Child Adolesc. Psychiatr. Clin. N. Am.* **19**, 229–61, viii  
822 (2010).
- 823 54. Brown, K. A., Parikh, S. & Patel, D. R. Understanding basic concepts of developmental  
824 diagnosis in children. *Transl Pediatr* **9**, S9–S22 (2020).
- 825 55. Yang, M., Silverman, J. L. & Crawley, J. N. Automated three-chambered social  
826 approach task for mice. *Curr. Protoc. Neurosci.* **Chapter 8**, Unit 8 26 (2011).
- 827 56. Datta, S. R., Anderson, D. J., Branson, K., Perona, P. & Leifer, A. Computational  
828 Neuroethology: A Call to Action. *Neuron* **104**, 11–24 (2019).
- 829 57. Berman, G. J. Measuring behavior across scales. *BMC Biol.* **16**, 23 (2018).
- 830 58. Machado, A. S., Marques, H. G., Duarte, D. F., Darmohray, D. M. & Carey, M. R.  
831 Shared and specific signatures of locomotor ataxia in mutant mice. *Neuroscience* **18**  
832 (2020).
- 833 59. Forkosh, O. *et al.* Identity domains capture individual differences from across the  
834 behavioral repertoire. *Nat. Neurosci.* **22**, 2023–2028 (2019).
- 835 60. Deverman, B. E. & Patterson, P. H. Cytokines and CNS development. *Neuron* **64**, 61–  
836 78 (2009).
- 837 61. Cowan, M. & Petri, W. A., Jr. Microglia: Immune Regulators of Neurodevelopment.  
838 *Front. Immunol.* **9**, 2576 (2018).
- 839 62. Pape, K., Tamouza, R., Leboyer, M. & Zipp, F. Immunoneuropsychiatry - novel  
840 perspectives on brain disorders. *Nat. Rev. Neurol.* **15**, 317–328 (2019).
- 841 63. Ahmed, A. A., El Shahaway, A. A. & Hussien, S. A. Activated PI3K-delta syndrome in an  
842 Egyptian pediatric cohort with primary immune deficiency. *Allergol. Immunopathol.*  
843 (2020). doi:10.1016/j.aller.2019.12.006
- 844 64. Ming, X., Brimacombe, M. & Wagner, G. C. Prevalence of motor impairment in autism  
845 spectrum disorders. *Brain Dev.* **29**, 565–570 (2007).
- 846 65. Law, A. J. *et al.* Neuregulin 1-ErbB4-PI3K signaling in schizophrenia and  
847 phosphoinositide 3-kinase-p110 $\delta$  inhibition as a potential therapeutic strategy. *Proc.*  
848 *Natl. Acad. Sci. U. S. A.* **109**, 12165–12170 (2012).



- 849 66. La Manno, G. *et al.* Molecular architecture of the developing mouse brain. *Cold Spring*  
850 *Harbor Laboratory* 2020.07.02.184051 (2020). doi:10.1101/2020.07.02.184051
- 851 67. Rosina, E. *et al.* Disruption of mTOR and MAPK pathways correlates with severity in  
852 idiopathic autism. *Transl. Psychiatry* **9**, 50 (2019).
- 853 68. Mühlebner, A., Bongaarts, A., Sarnat, H. B., Scholl, T. & Aronica, E. New insights into a  
854 spectrum of developmental malformations related to mTOR dysregulations: challenges  
855 and perspectives. *J. Anat.* **235**, 521–542 (2019).
- 856 69. Tsai, P. T. *et al.* Sensitive Periods for Cerebellar-Mediated Autistic-like Behaviors. *Cell*  
857 *Rep.* **25**, 357–367.e4 (2018).
- 858 70. Shi, L., Fatemi, S. H., Sidwell, R. W. & Patterson, P. H. Maternal influenza infection  
859 causes marked behavioral and pharmacological changes in the offspring. *J. Neurosci.*  
860 **23**, 297–302 (2003).
- 861 71. Haida, O. *et al.* Sex-dependent behavioral deficits and neuropathology in a maternal  
862 immune activation model of autism. *Transl. Psychiatry* **9**, 124 (2019).
- 863 72. Amodeo, D. A. *et al.* Maternal immune activation impairs cognitive flexibility and alters  
864 transcription in frontal cortex. *Neurobiol. Dis.* **125**, 211–218 (2019).
- 865 73. Sabourin, K. R. *et al.* Infections in children with autism spectrum disorder: Study to  
866 Explore Early Development (SEED). *Autism Res.* **12**, 136–146 (2019).
- 867 74. Lee, B. K. *et al.* Maternal hospitalization with infection during pregnancy and risk of  
868 autism spectrum disorders. *Brain Behav. Immun.* **44**, 100–105 (2015).
- 869 75. Atladóttir, H. O. *et al.* Maternal infection requiring hospitalization during pregnancy and  
870 autism spectrum disorders. *J. Autism Dev. Disord.* **40**, 1423–1430 (2010).
- 871 76. Patel, S. *et al.* Social impairments in autism spectrum disorder are related to maternal  
872 immune history profile. *Mol. Psychiatry* **23**, 1794–1797 (2018).
- 873 77. Yildirim, M. *et al.* Neurologic Involvement in Primary Immunodeficiency Disorders. *J.*  
874 *Child Neurol.* **33**, 320–328 (2018).
- 875 78. Subbarayan, A. *et al.* Clinical features that identify children with primary  
876 immunodeficiency diseases. *Pediatrics* **127**, 810–816 (2011).

- 877 79. Sgritta, M. *et al.* Mechanisms Underlying Microbial-Mediated Changes in Social  
878 Behavior in Mouse Models of Autism Spectrum Disorder. *Neuron* **101**, 246–259.e6  
879 (2019).
- 880 80. Qiao, Y. *et al.* Alterations of oral microbiota distinguish children with autism spectrum  
881 disorders from healthy controls. *Sci. Rep.* **8**, 1597 (2018).
- 882 81. Carissimi, C. *et al.* Functional analysis of gut microbiota and immunoinflammation in  
883 children with autism spectrum disorders. *Dig. Liver Dis.* **51**, 1366–1374 (2019).
- 884 82. Sun, H., You, Z., Jia, L. & Wang, F. Autism spectrum disorder is associated with gut  
885 microbiota disorder in children. *BMC Pediatr.* **19**, 516 (2019).
- 886 83. Kang, D.-W. *et al.* Long-term benefit of Microbiota Transfer Therapy on autism  
887 symptoms and gut microbiota. *Sci. Rep.* **9**, 5821 (2019).
- 888 84. Preite, S. *et al.* Hyperactivated PI3K $\delta$  promotes self and commensal reactivity at the  
889 expense of optimal humoral immunity. *Nat. Immunol.* **19**, 986–1000 (2018).
- 890 85. Steinbach, E. C. *et al.* Innate PI3K p110 $\delta$  regulates Th1/Th17 development and  
891 microbiota-dependent colitis. *J. Immunol.* **192**, 3958–3968 (2014).
- 892 86. Oka, A. *et al.* Phosphoinositide 3-Kinase P110 $\delta$ -Signaling Is Critical for Microbiota-  
893 Activated IL-10 Production by B Cells that Regulate Intestinal Inflammation. *Cells* **8**,  
894 (2019).
- 895 87. Meltzer, A. & Van de Water, J. The Role of the Immune System in Autism Spectrum  
896 Disorder. *Neuropsychopharmacology* **42**, 284–298 (2017).
- 897 88. Nazeen, S., Palmer, N. P., Berger, B. & Kohane, I. S. Integrative analysis of genetic  
898 data sets reveals a shared innate immune component in autism spectrum disorder and  
899 its co-morbidities. *Genome Biol.* **17**, 228 (2016).
- 900 89. Tippett, W. J. & Sergio, L. E. Visuomotor integration is impaired in early stage  
901 Alzheimer's disease. *Brain Res.* **1102**, 92–102 (2006).
- 902 90. Inzelberg, R., Schechtman, E. & Hocherman, S. Visuo-motor coordination deficits and  
903 motor impairments in Parkinson's disease. *PLoS One* **3**, e3663 (2008).
- 904 91. de Boer, C., van der Steen, J., Mattace-Raso, F., Boon, A. J. W. & Pel, J. J. M. The

- 905 Effect of Neurodegeneration on Visuomotor Behavior in Alzheimer's Disease and  
906 Parkinson's Disease. *Motor Control* **20**, 1–20 (2016).
- 907 92. Pel, J. J. M. *et al.* Early identification of cerebral visual impairments in infants born  
908 extremely preterm. *Dev. Med. Child Neurol.* **58**, 1030–1035 (2016).
- 909 93. Ben-Shaul, Y. OptiMouse: a comprehensive open source program for reliable detection  
910 and analysis of mouse body and nose positions. *BMC Biol.* **15**, 41 (2017).
- 911 94. van den Boom, B. J. G., Pavlidi, P., Wolf, C. J. H., Mooij, A. H. & Willuhn, I. Automated  
912 classification of self-grooming in mice using open-source software. *J. Neurosci.*  
913 *Methods* **289**, 48–56 (2017).
- 914 95. Ueno, H. *et al.* Effects of repetitive gentle handling of male C57BL/6NCrl mice on  
915 comparative behavioural test results. *Sci. Rep.* **10**, 3509 (2020).
- 916 96. Sonzogni, M. *et al.* A behavioral test battery for mouse models of Angelman syndrome:  
917 a powerful tool for testing drugs and novel Ube3a mutants. *Mol. Autism* **9**, 47 (2018).
- 918 97. Reith, R. M., Way, S., McKenna, J., 3rd, Haines, K. & Gambello, M. J. Loss of the  
919 tuberous sclerosis complex protein tuberin causes Purkinje cell degeneration.  
920 *Neurobiol. Dis.* **43**, 113–122 (2011).
- 921 98. Duda, R. O., Hart, P. E. & Stork, D. G. *Pattern classification and scene analysis.* **3**,  
922 (Wiley New York, 1973).
- 923 99. Gomez, M. J. *et al.* Comparison of methods for outlier detection and their effects on the  
924 classification results for a particular data base. *Anal. Chim. Acta* **239**, 229–243 (1990).
- 925 100. Ng, M. K., Liao, L.-Z. & Zhang, L. On sparse linear discriminant analysis algorithm for  
926 high-dimensional data classification. *Numer. Linear Algebra Appl.* **18**, 223–235 (2011).
- 927 101. Landau, D. P. & Binder, K. *A Guide to Monte Carlo Simulations in Statistical Physics.*  
928 (Cambridge University Press, 2005).
- 929 102. Vries, E. de *et al.* Immunologie in de medische praktijk. XXXIV. Diagnostiek bij vermoeden  
930 van een afweerstoornis: inleiding. (2000). at  
931 <<https://repository.ubn.ru.nl/handle/2066/144811>>
- 932 103. Comans-Bitter, W. M. *et al.* Immunophenotyping of blood lymphocytes in childhood.

933 Reference values for lymphocyte subpopulations. *J. Pediatr.* **130**, 388–393 (1997).

## Figures

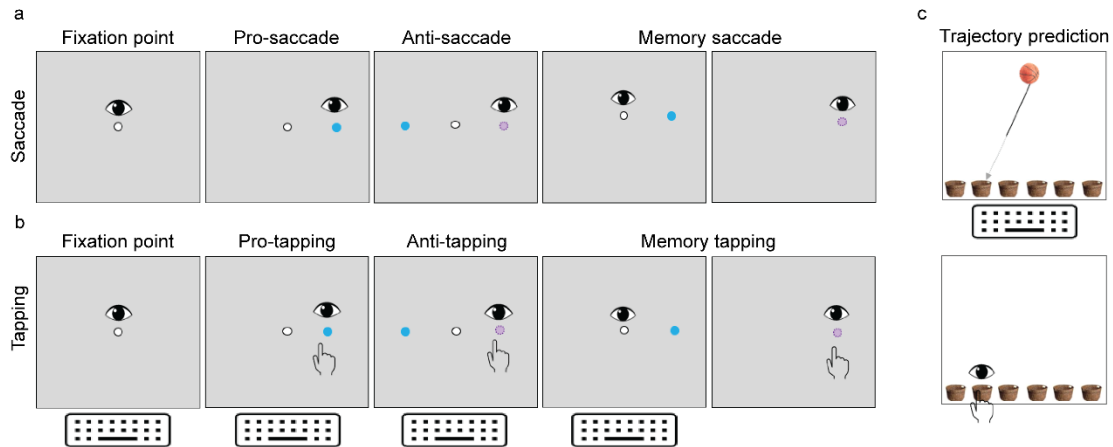

Figure 1: **Visuomotor assessment tasks.** Visual representation of the saccade (a), tapping (b) and trajectory prediction (c) tasks performed by patients P1 and P2, and respective age-matched controls. Pro- tasks involved the execution of reflexive saccades (and tapping) towards a newly appeared target while anti- tasks required a saccade execution (and tapping) to the opposite side of the new target. In memory tasks, subjects waited for target omission to perform a saccade (and tapping). Trajectory prediction tasks involved the execution of a saccade and tapping towards the basket in which a moving ball would be expected to fall. The number and age distribution of control participants per task can be found in Table 3.

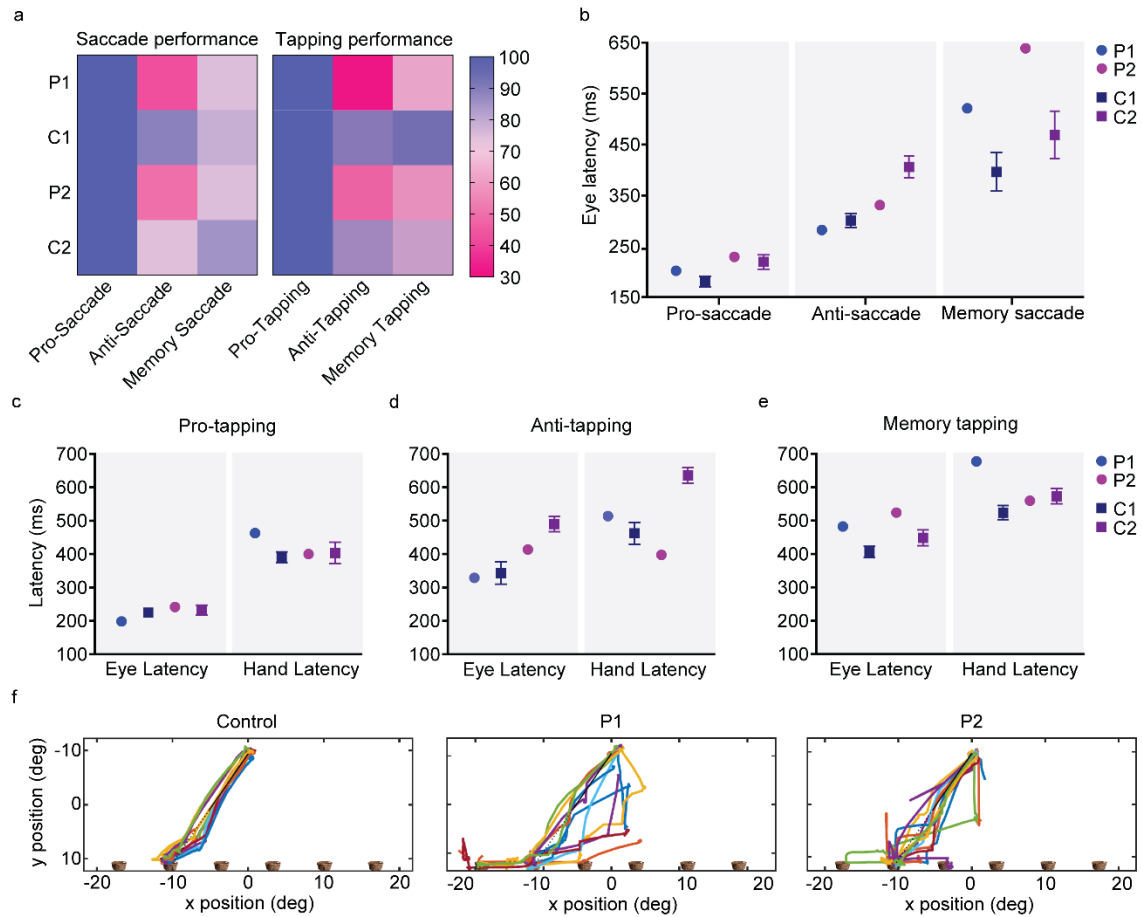

**Figure 2: APDS patients present with intact reflexive saccades but altered integration.**

a) Performance in the saccade and tapping tasks is presented as percentage of correct trials. Eye latency for the saccade tasks (b), and eye and hand latency for the tapping tasks (c-e) are presented in ms. f) Representative traces of the eye trajectories performed towards one basket, during the trajectory prediction task. P1, patient 1, P2, patient 2; C1, age-matched controls for patient 1, C2, age-matched controls for patient 2.

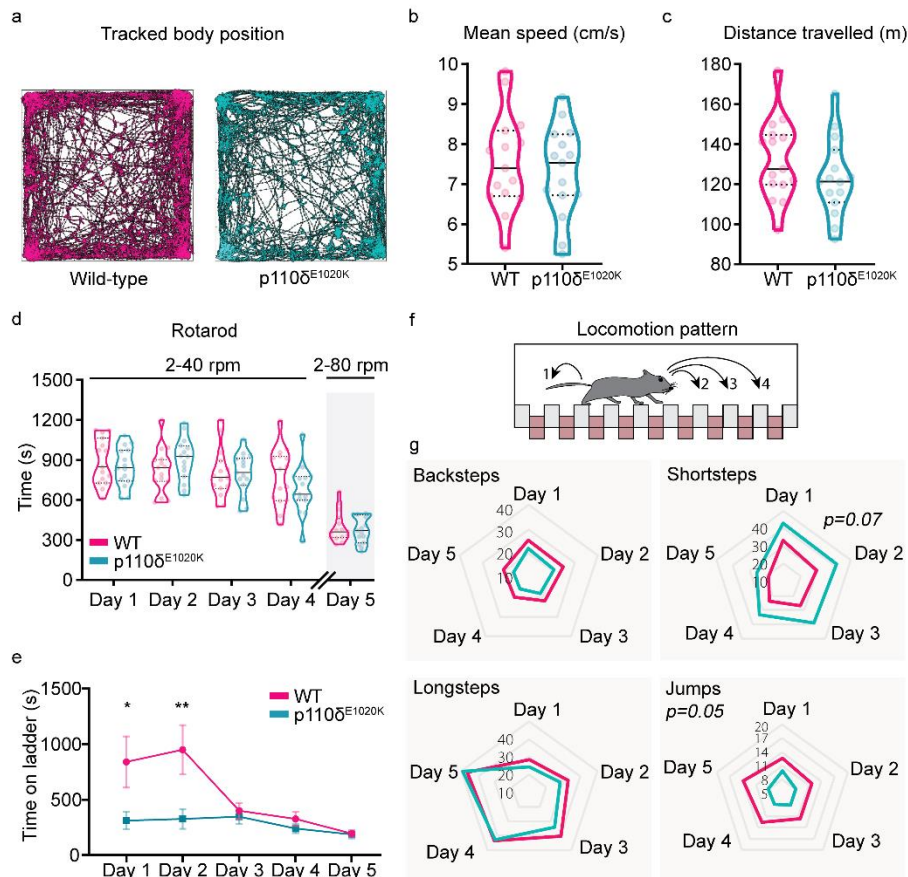

**Figure 3: Slight fine locomotion impairments are caused by the murine E1020K mutation.** a) Example of automatically tracked trajectories showing the body position of a WT and a p110 $\delta$ <sup>E1020K</sup> mouse during the 30 minutes of the OF task. b-c) Quantification of the mean speed ( $n = 15$  per genotype) and total distance travelled ( $n = 15$  WT and 14 p110 $\delta$ <sup>E1020K</sup>) during the OF task, presented as median and quartiles (2-tailed t-test). d) The total time each mouse spent on the rotarod, over the course of 4 trials/day, is presented as median and quartiles (2-way repeated-measures ANOVA,  $n = 15$  per genotype). On the last day, the maximum rod speed was increased to 80 rpm. e-g) The Erasmus ladder was used to investigate locomotion pattern. The average time each mouse spent on the ladder, across 42 daily trials, is presented in (e) (2-tailed Mann-Whitney; data presented as mean  $\pm$  SEM). The distinct step types analysed are schematically represented in (f) and quantified in (g) (Mixed effects model; data is presented as daily mean percentage,  $n = 15$  per genotype). \*  $p \leq 0.05$ , \*\*  $p \leq 0.01$ , \*\*\*  $p \leq 0.001$ .



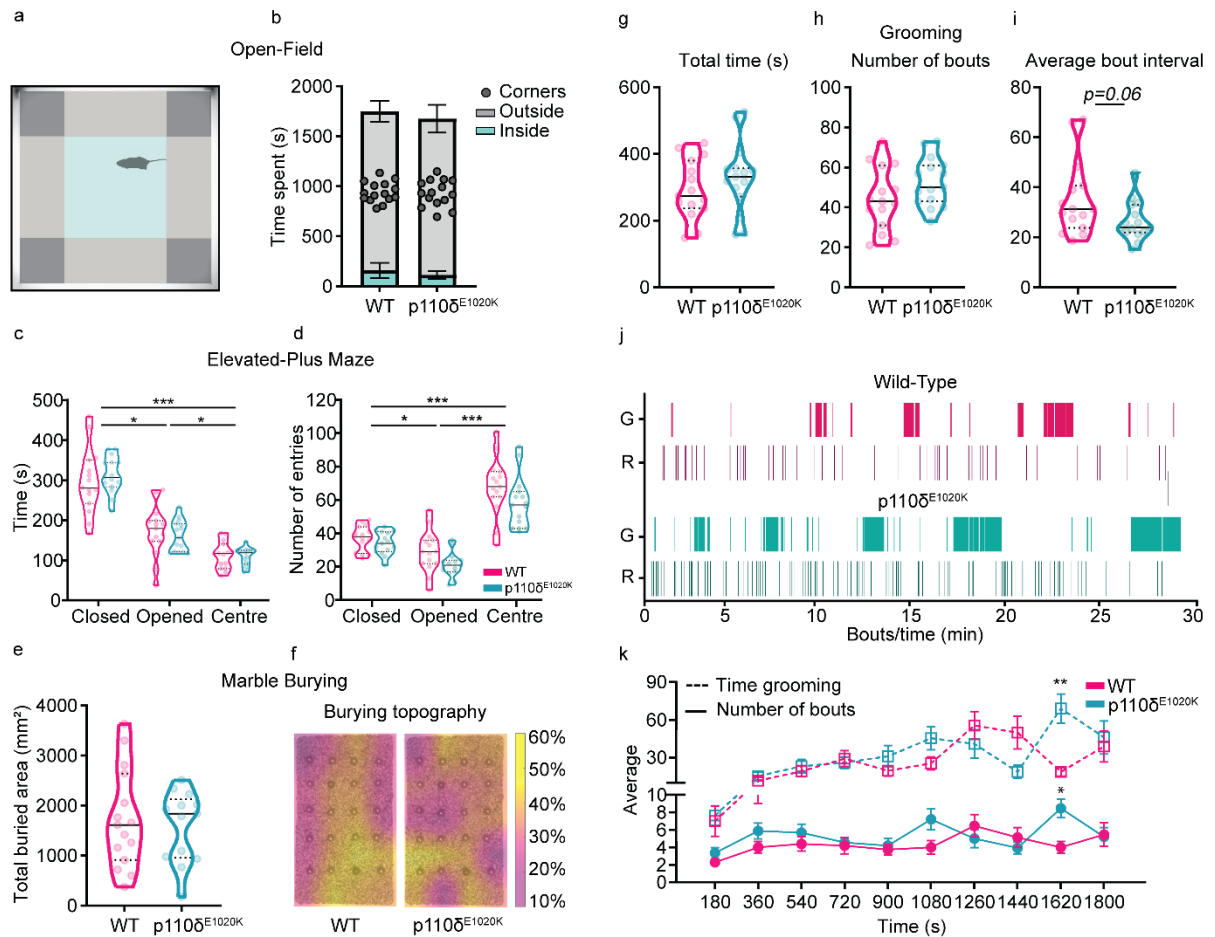

**Figure 4:  $p110\delta^{E1020K}$  mice exhibit subtle changes in burying and grooming patterns.** a) Representation of the OF arena parcellation into corner, outside and inside areas. b) Total time spent on each OF area (2-tailed Mann-Whitney; data presented as mean  $\pm$  SD). c-d) Total time spent and number of entries performed in each EPM area (2-way repeated-measures ANOVA; data are presented as median and quartiles). e) Total marble area buried during the MB task (2-tailed t-test). f) Marble disposition before the task, superimposed with the average percentage of buried area per marble ( $n = 15$  WT and  $n = 13$   $p110\delta^{E1020K}$ ). g-i) Quantification of the total time spent grooming (g), total number of grooming bouts (h) and the average time interval between grooming bouts (i), during the grooming assay (2-tailed t-test; data presented as median and quartiles). j) Representative plot depicting grooming and rearing events for one mouse of each genotype. k) Time-binned plot with the average time spent grooming (dashed line; 2-way repeated-measures ANOVA) and the average number of grooming bouts (full line; mixed effects model) (data are presented as mean  $\pm$  SEM). G, grooming, R, rearing; \*  $p \leq 0.05$ , \*\*  $p \leq 0.01$ , \*\*\*  $p \leq 0.001$ ,  $n = 15$  mice per genotype, expect for e) and f) (see above).

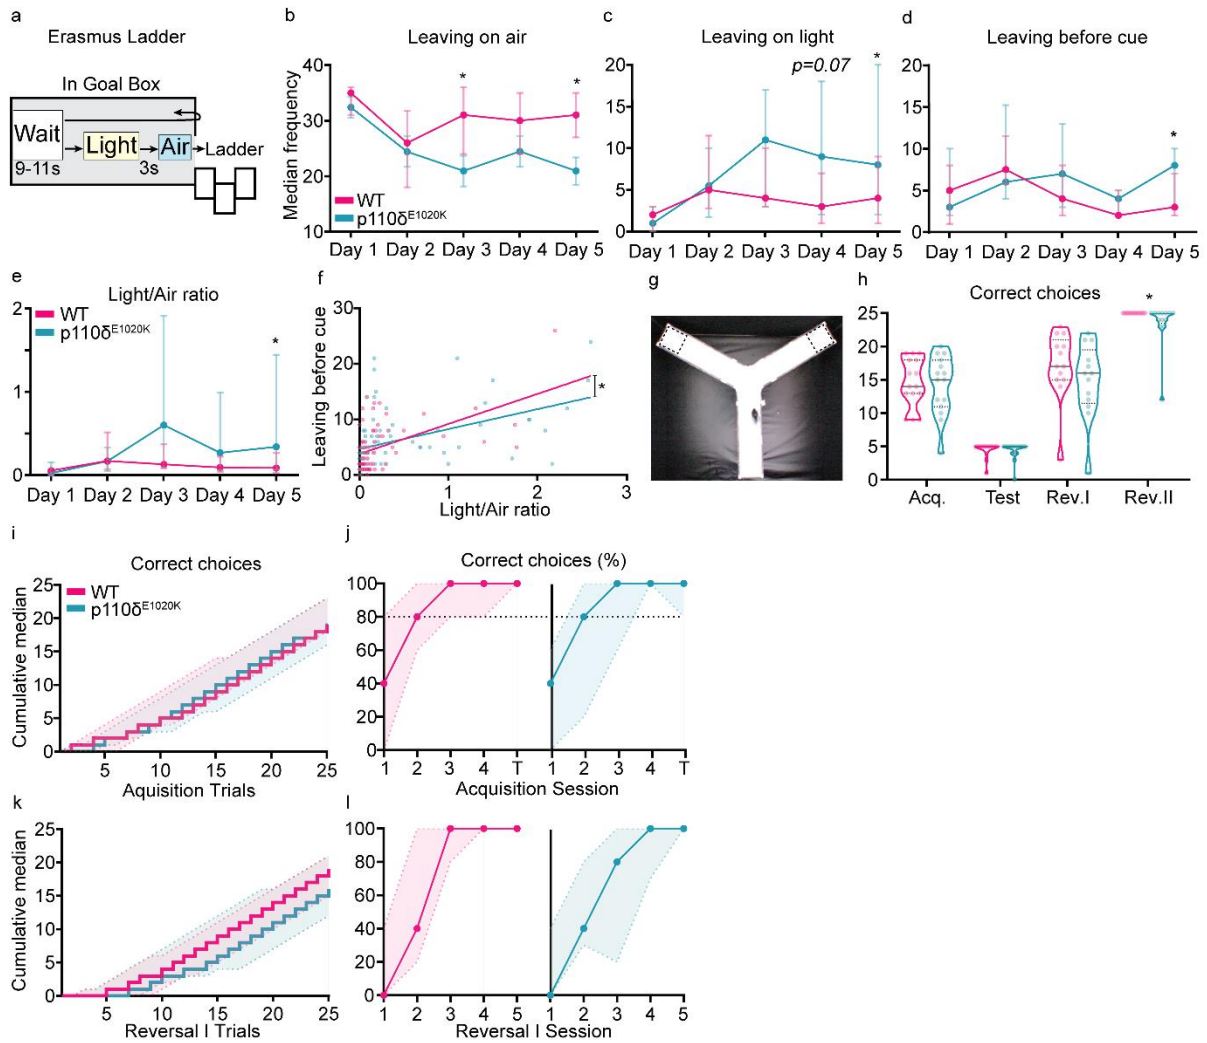

**Figure 5: Stimulus-dependent ladder exit and reversal learning are mildly affected in  $p110\delta^{E1020K}$  mice.** a) Schematic of the Erasmus ladder goal-box with the time intervals between stimuli. b-d) Number of times individual mice left the goal-box with the air stimulus (b), the light stimulus (c), or before light cue presentation (d). e) ratio between light and air exits. f) Best-fit regression model between the data points used to plot (d) and (e). g) Picture of the Y-Maze, with dashed squares representing the possible locations for the hidden platform, either on the right or left arm of the apparatus. h) Total number of correct arm choices for both genotypes, during each phase of the Y-Maze (data presented as median with interquartile range). i) Step function with the cumulative median and interquartile range for the number of correct arm choices during all acquisition and test trials. j) Percentage of correct arm choices for each genotype over the four days of acquisition and the day of test (data presented as median with interquartile range) k-l) Similar to (i) and (j) but for the reversal I phase. 2-tailed Mann-Whitney, except for f). \*  $p \leq 0.05$ ,  $n = 15$  mice per genotype, except for reversal phases where  $n = 13$ .

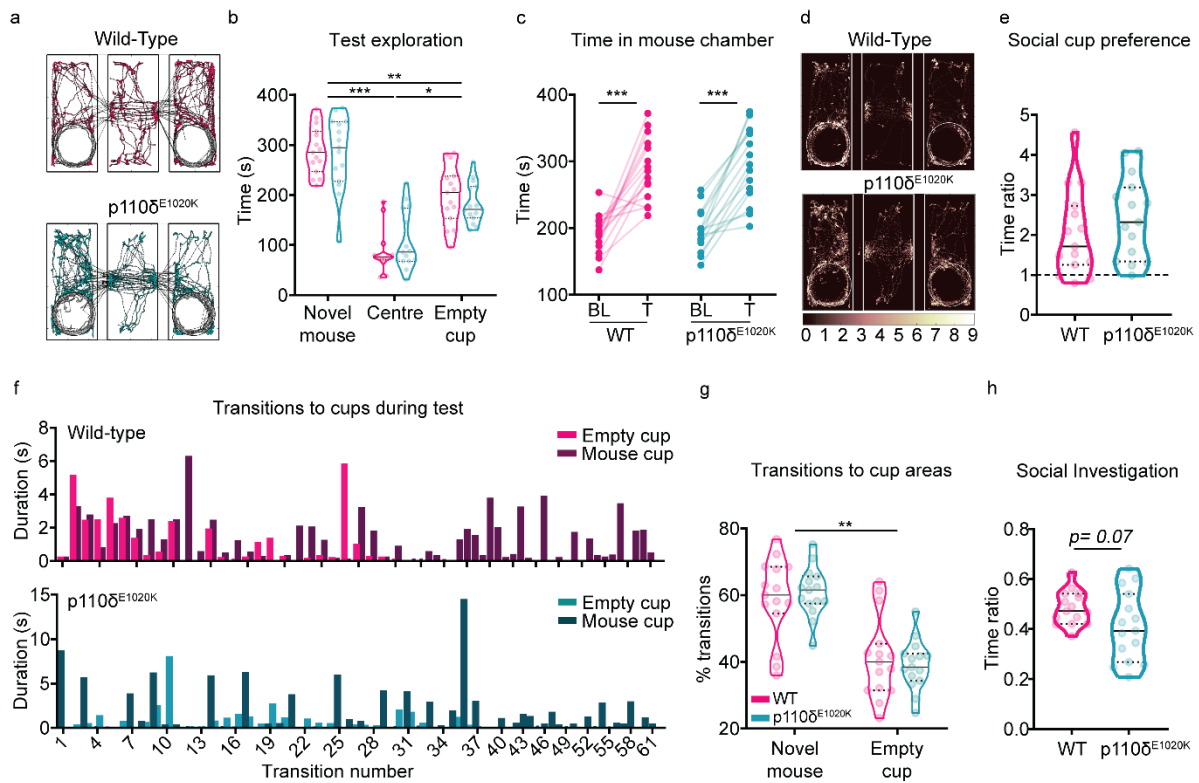

**Figure 6: Social behaviour is largely preserved in  $p110\delta^{E1020K}$  mice.** a) Example of automatically tracked body positions during test phase (novel mouse on the left). b) Total time individual mice spent in each chamber of the apparatus during test phase (mixed effects model; data presented as median with interquartile range). c) Before and after plot of the total time each individual mouse spent on the novel mouse chamber during baseline (BL) and test (T) (2-way repeated-measures ANOVA). d) Body position heatmap depicting position frequency per 2.5mm bins (novel mouse on the left). e) Median and quartiles with the ratio between the time each individual mouse spent near the social cup over the time it spent near the empty cup (2-tailed t-test). f) Representative plot with the duration, in seconds, of each transition into the empty (light bars) or novel mouse (dark bars) cup area. g) Median and quartiles with the percentage of transitions each individual mouse made to the novel mouse or empty cup (2-way repeated-measures ANOVA); h) Median and quartiles of the ratio between the time individual mice spent exploring the novel mouse cup over the time spent in the whole novel mouse chamber (2-tailed t-test). \*  $p \leq 0.05$ , \*\*  $p \leq 0.01$ , \*\*\*  $p \leq 0.001$ .  $n = 15$  mice per genotype.

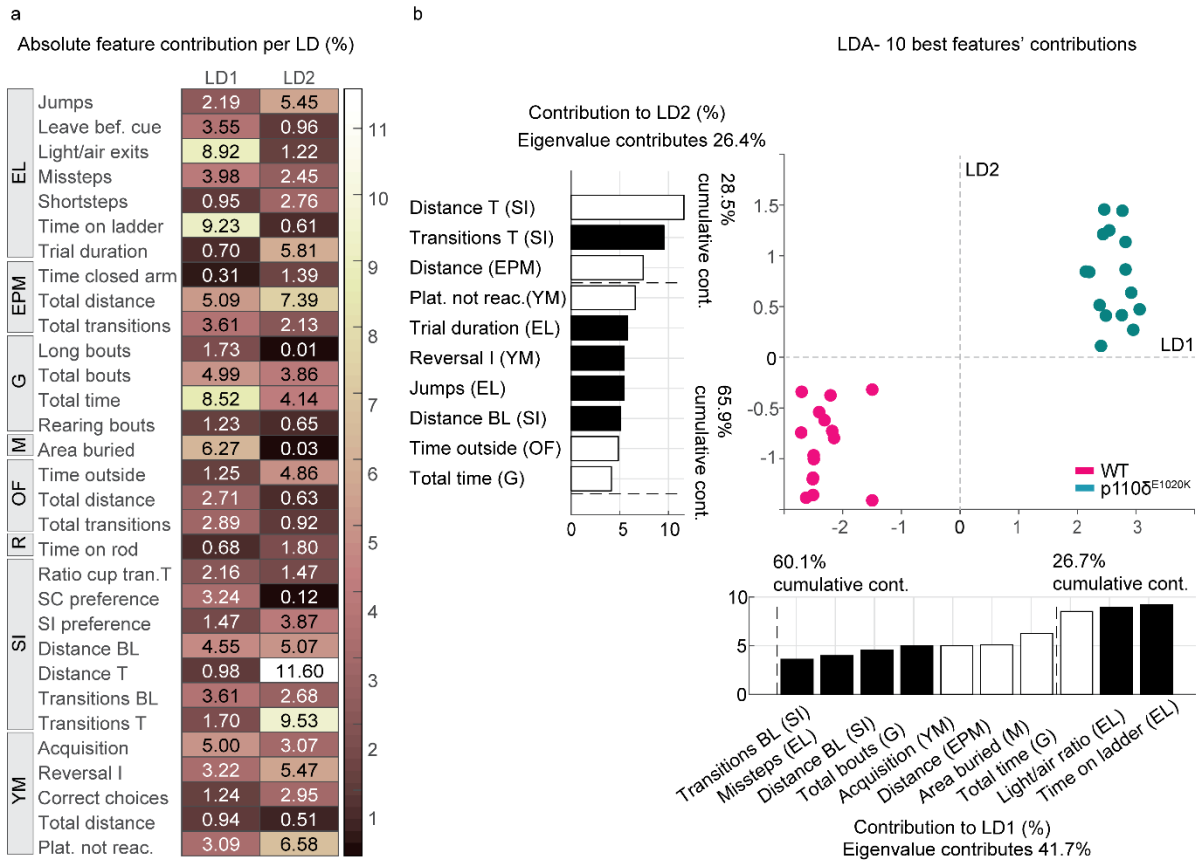

**Figure 7: LD1 and LD2 features separate WT from p110 $\delta$ <sup>E1020K</sup> mice.** a) Absolute contribution of each behavioural variable, in percentage, to linear discriminants 1 and 2, resulting from the LDA. b) LDA plot featuring the 10 best contributors to LD1 and LD2. Negative and positive contributions are represented by black and white bars, respectively. Each dot represents one mouse, with pink dots representing WT mice and green dots p110 $\delta$ <sup>E1020K</sup> mice. n = 15 mice per genotype. EL, Erasmus ladder, EPM, elevated-plus maze, G, grooming, M, marble burying, OF, open-field, R, rotarod, SI, social interaction, YM, water y-maze.

## Tables

|                           |                                                                                                                                                                            |                                                                |
|---------------------------|----------------------------------------------------------------------------------------------------------------------------------------------------------------------------|----------------------------------------------------------------|
| Sex                       | Male (P1)                                                                                                                                                                  | Female (P2)                                                    |
| Age (diagnosis)           | 29 (3.5 years)                                                                                                                                                             | 56 (childhood)                                                 |
| Mutation                  | E1021K                                                                                                                                                                     | E1021K                                                         |
| Response to immunization  | ↓ <i>S. pneumonia</i> (polysaccharide response)                                                                                                                            | ↓ <i>Influenza</i> type A and type B                           |
| Hepato/spleno megaly      | Splenomegaly                                                                                                                                                               | Absent                                                         |
| Cytopenia                 | Leucopenia, thrombocytopenia                                                                                                                                               | None                                                           |
| CT-chest results          | Air trapping, no bronchiectasis                                                                                                                                            | Bronchiectasis                                                 |
| Hematological malignancy  | No                                                                                                                                                                         | No                                                             |
| Other comorbidities       | Psychomotor developmental delay<br>SLE-like auto-immune disease<br>Recurrent EBV infections<br>Autoimmune hepatitis with liver cirrhosis and portal hypertension           | None                                                           |
| Ig therapy                | Intravenous Ig replacement therapy: 35 g, every 3 weeks                                                                                                                    | Intravenous Ig replacement therapy: 15 g, every 4 weeks        |
| Other relevant treatments | Prednisone: 10 mg, once daily<br>Mycophenolate mofetil: 500 mg, twice daily<br>Hydroxychloroquine: 200 mg, once daily<br>Trimethoprim/sulfamethoxazole: 480 mg, once daily | No immunosuppressive medication<br>No prophylactic antibiotics |

Table 1: **P1 and P2 clinical characteristics.** SLE, systemic lupus erythematosus; ↓, decreased compared to control age-matched range.

| Patient                                                                                    | P1                                                                                                                                                                                                                                                                                                                                                                                                                                                                                                                                                                                                                                                                                                                                                                                                                                                                                                                                                                                                                                                                                     | P2                                                                                                                                                                                      |
|--------------------------------------------------------------------------------------------|----------------------------------------------------------------------------------------------------------------------------------------------------------------------------------------------------------------------------------------------------------------------------------------------------------------------------------------------------------------------------------------------------------------------------------------------------------------------------------------------------------------------------------------------------------------------------------------------------------------------------------------------------------------------------------------------------------------------------------------------------------------------------------------------------------------------------------------------------------------------------------------------------------------------------------------------------------------------------------------------------------------------------------------------------------------------------------------|-----------------------------------------------------------------------------------------------------------------------------------------------------------------------------------------|
| Ig at diagnosis<br>(g/L; range (102))                                                      | <b>IgG</b> 0.46 (4.0-11.0), <b>IgA</b> 0.45 (0.1-1.6),<br><b>IgM</b> 3.24 (0.5-1.8)                                                                                                                                                                                                                                                                                                                                                                                                                                                                                                                                                                                                                                                                                                                                                                                                                                                                                                                                                                                                    | <i>Unknown</i>                                                                                                                                                                          |
| T/B/NK cells at diagnosis<br>(absx10 <sup>9</sup> /L; range (103))                         | <b>T cells</b> 3.66 (0.9-4.5), <b>CD4<sup>+</sup> T cells</b> 0.51<br>(0.5-2.4), <b>CD8<sup>+</sup> T cells</b> 3.15 (0.3-1.6), <b>B</b><br><b>cells</b> 0.26 (0.2-2.1), <b>NK cells</b> 0.26 (0.1-<br>1.0)                                                                                                                                                                                                                                                                                                                                                                                                                                                                                                                                                                                                                                                                                                                                                                                                                                                                            | <i>Unknown</i>                                                                                                                                                                          |
| T/B/NK cells<br>(absx10 <sup>9</sup> /L; range (103))<br>[B cell subsets in abs, cells/ul] | <b>Age 22</b><br><b>CD3<sup>+</sup> T cells</b> 0.23 (0.7-2.1); <b>CD4<sup>+</sup> T</b><br><b>cells</b> 0.1 (0.3-1.4): Naïve<br>(CD4 <sup>+</sup> /CD27 <sup>+</sup> /CD45RA <sup>+</sup> ) 14.4%,<br>Memory (CD4 <sup>+</sup> /CD27 <sup>+</sup> CD45RA <sup>-</sup> )<br>83.6%, Effector Memory<br>(CD4 <sup>+</sup> /CD27 <sup>+</sup> /CD45RA <sup>+/-</sup> ) 2.0%; <b>CD8<sup>+</sup></b><br><b>T cells</b> 0.1 (0.2-1.2): Naïve<br>(CD8 <sup>+</sup> CD27 <sup>+</sup> CD45RA <sup>+</sup> ) 37.7%, Memory<br>(CD8 <sup>+</sup> /CD27 <sup>+</sup> /CD45RA <sup>-</sup> ) 33.2%,<br>Effector Memory (CD8 <sup>+</sup> /CD27 <sup>-</sup><br>/CD45RA <sup>+/-</sup> ) 29.1%; <b>CD19<sup>+</sup> B cells</b><br>0.01 (0.1-0.5): Naïve (IgD <sup>+</sup> /CD27 <sup>-</sup> ) 7<br>(57-447), Marginal Zone/Natural<br>effector (IgD <sup>+</sup> /CD27 <sup>+</sup> ) 1 (9-88),<br>Memory (IgD <sup>-</sup> /CD27 <sup>+</sup> ) 1 (13-122) [IgM <sup>+</sup><br>48% (4-37), IgM <sup>-</sup> 52%]; <b>CD16.56<sup>+</sup>CD3<sup>-</sup></b><br><b>NK cells</b> 0.04 (0.09-0.6) | <b>Age 43</b><br><b>CD3<sup>+</sup> T cells</b> 0.53 (0.7-2.1)<br><b>CD19<sup>+</sup> B cells</b> 0.09 (0.1-0.5):<br><b>CD16.56<sup>+</sup>CD3<sup>-</sup> NK cells</b> 0.15 (0.09-0.6) |
| Ig (g/L; range (102))                                                                      | <b>Age 28</b><br><b>IgG</b> 12.0 (6.0-12.3), <b>IgA</b> 0.43 (0.3-2.0),<br><b>IgM</b> 3.24 (0.5-2.0)                                                                                                                                                                                                                                                                                                                                                                                                                                                                                                                                                                                                                                                                                                                                                                                                                                                                                                                                                                                   | <b>Age 55</b><br><b>IgG</b> 16.6 (6.0-12.3), <b>IgA</b> 1.49 (0.3-2.0),<br><b>IgM</b> 4.75 (0.5-2.0)                                                                                    |

Table 2: **P1 and P2 immunological findings.** Abs, absolute numbers; ↓, decreased compared to control age-matched range.

| Visuomotor assessment  | Control 1               |      |    | Control 2               |       |    |
|------------------------|-------------------------|------|----|-------------------------|-------|----|
|                        | Age<br>(average, years) | SD   | N  | Age<br>(average, years) | SD    | N  |
| Pro-saccade            | 24,82                   | 5,04 | 12 | 54,00                   | 13,39 | 11 |
| Anti-saccade           | 25,00                   | 3,35 | 14 | 57,70                   | 8,66  | 17 |
| Memory saccade         | 24,84                   | 5,28 | 11 | 45,70                   | 7,27  | 10 |
| Pro-tapping            | 24,76                   | 3,88 | 10 | 56,80                   | 13,11 | 10 |
| Anti-tapping           | 24,90                   | 7,06 | 10 | 55,96                   | 7,68  | 28 |
| Memory tapping         | 25,47                   | 5,67 | 10 | 53,62                   | 6,31  | 16 |
| Trajectory prediction* | 38,30                   | 8,78 | 10 | NA                      | NA    | NA |

Table 3: **Characteristics of controls.** Age-matched individuals were tested in visuomotor assessment tasks and used as controls for patient 1 or patient 2. \* for the trajectory prediction task, only one control group was used.
